# Supplementary material for: Differentially Expressed lncRNAs Related to the Development of Abdominal Fat in Gushi Chickens and Their Interaction Regulatory Network
Source: Front Genet. 2021 Dec 24;12:802857. doi: 10.3389/fgene.2021.802857 (PMC8740130; doi:10.3389/fgene.2021.802857)
Supplement: Supplementary file 1 [file Table3.XLSX]

## Sheet: lnc_miRNA
Table S3. The interaction between DE-lncRNAs and DE-miRNAs.
miRNA	lncRNA
gga-miR-449a	ENSGALG00000001885
gga-miR-34c-5p	ENSGALG00000001885
gga-miR-217-5p	ENSGALG00000001885
gga-miR-204	ENSGALG00000018702
gga-miR-365-3p	ENSGALG00000018702
gga-miR-9-5p	ENSGALG00000018702
gga-miR-365-3p	ENSGALG00000020985
gga-miR-202-5p	ENSGALG00000020985
gga-miR-449a	ENSGALG00000020985
gga-miR-34b-5p	ENSGALG00000020985
gga-miR-34c-5p	ENSGALG00000020985
gga-miR-146c-3p	ENSGALG00000020985
gga-miR-200b-5p	ENSGALG00000020985
gga-miR-429-3p	ENSGALG00000020985
gga-miR-204	ENSGALG00000020985
gga-miR-200b-3p	ENSGALG00000020985
gga-miR-200a-3p	ENSGALG00000020985
gga-let-7j-3p	ENSGALG00000020985
gga-miR-499-3p	ENSGALG00000020985
gga-miR-10a-5p	ENSGALG00000020985
gga-miR-34c-3p	ENSGALG00000020985
gga-miR-217-5p	ENSGALG00000020985
gga-miR-34c-5p	ENSGALG00000037810
gga-miR-200b-5p	ENSGALG00000037810
gga-miR-99a-5p	ENSGALG00000037810
gga-miR-125b-5p	ENSGALG00000037810
gga-miR-203a	ENSGALG00000037810
gga-miR-29b-3p	ENSGALG00000037810
gga-let-7j-3p	ENSGALG00000037810
gga-miR-133b	ENSGALG00000037810
gga-miR-200a-3p	ENSGALG00000037810
gga-miR-130b-3p	ENSGALG00000037810
gga-miR-206	ENSGALG00000037810
gga-miR-1729-5p	ENSGALG00000037810
gga-miR-365b-5p	ENSGALG00000037810
gga-miR-133a-3p	ENSGALG00000037810
gga-miR-196-5p	ENSGALG00000037810
gga-miR-1684a-3p	ENSGALG00000037810
gga-miR-217-5p	ENSGALG00000037810
gga-miR-449a	ENSGALG00000037810
gga-miR-375	ENSGALG00000037810
gga-miR-223	ENSGALG00000037810
gga-miR-460b-5p	ENSGALG00000037810
gga-miR-146c-3p	ENSGALG00000037810
gga-miR-1744-3p	ENSGALG00000037810
gga-miR-122-5p	ENSGALG00000037810
gga-miR-184-3p	ENSGALG00000037810
gga-miR-365-3p	ENSGALG00000037810
gga-miR-202-5p	ENSGALG00000037810
gga-miR-10a-5p	ENSGALG00000037810
gga-miR-200b-3p	ENSGALG00000037810
gga-miR-499-3p	ENSGALG00000037810
gga-miR-454-3p	ENSGALG00000037810
gga-miR-1a-3p	ENSGALG00000037810
gga-miR-204	ENSGALG00000037810
gga-miR-187-3p	ENSGALG00000037810
gga-miR-1b-3p	ENSGALG00000037810
gga-miR-9-5p	ENSGALG00000037810
gga-miR-133c-3p	ENSGALG00000037810
gga-miR-3531-5p	ENSGALG00000037810
gga-miR-31-5p	ENSGALG00000037810
gga-miR-429-3p	ENSGALG00000037810
gga-miR-34b-5p	ENSGALG00000037810
gga-miR-133a-5p	ENSGALG00000037810
gga-miR-499-5p	ENSGALG00000037810
gga-miR-155	ENSGALG00000037810
gga-miR-9-5p	ENSGALG00000031532
gga-miR-34b-5p	ENSGALG00000031532
gga-miR-200b-3p	ENSGALG00000030728
gga-miR-429-3p	ENSGALG00000030728
gga-miR-9-5p	ENSGALG00000030728
gga-miR-29b-3p	ENSGALG00000030728
gga-miR-31-5p	ENSGALG00000030728
gga-miR-125b-5p	ENSGALG00000030728
gga-miR-34b-5p	ENSGALG00000042431
gga-miR-200a-5p	ENSGALG00000042431
gga-miR-460b-5p	ENSGALG00000042431
gga-miR-449a	ENSGALG00000042431
gga-miR-200b-5p	ENSGALG00000042431
gga-miR-1729-5p	ENSGALG00000042431
gga-miR-215-5p	ENSGALG00000042431
gga-miR-34c-5p	ENSGALG00000042431
gga-miR-215-5p	ENSGALG00000030728
gga-miR-200b-3p	ENSGALG00000043800
gga-miR-10a-5p	ENSGALG00000043800
gga-miR-499-5p	ENSGALG00000043800
gga-miR-130b-3p	ENSGALG00000043800
gga-miR-454-3p	ENSGALG00000043800
gga-miR-429-3p	ENSGALG00000043800
gga-miR-460b-5p	ENSGALG00000035807
gga-miR-499-5p	ENSGALG00000035807
gga-miR-200a-3p	ENSGALG00000035807
gga-miR-223	ENSGALG00000038021
gga-miR-130b-3p	ENSGALG00000036399
gga-miR-125b-5p	ENSGALG00000036399
gga-miR-454-3p	ENSGALG00000036399
gga-miR-184-3p	ENSGALG00000036399
gga-miR-499-3p	ENSGALG00000036399
gga-miR-217-5p	ENSGALG00000036399
gga-miR-365-3p	ENSGALG00000037616
gga-miR-34c-5p	ENSGALG00000037616
gga-miR-449a	ENSGALG00000037616
gga-miR-34c-3p	ENSGALG00000033453
gga-miR-200a-5p	ENSGALG00000033453
gga-miR-1684a-3p	ENSGALG00000033453
gga-miR-34b-5p	ENSGALG00000033453
gga-miR-203a	ENSGALG00000033453
gga-miR-204	ENSGALG00000033453
gga-miR-429-3p	ENSGALG00000033453
gga-miR-1744-3p	ENSGALG00000033453
gga-miR-365b-5p	ENSGALG00000033453
gga-miR-29b-3p	ENSGALG00000033453
gga-miR-200b-5p	ENSGALG00000033453
gga-miR-34b-3p	ENSGALG00000033453
gga-miR-194	ENSGALG00000033453
gga-miR-31-5p	ENSGALG00000033453
gga-miR-499-3p	ENSGALG00000033453
gga-miR-449a	ENSGALG00000033453
gga-miR-365-3p	ENSGALG00000033453
gga-miR-454-3p	ENSGALG00000033453
gga-miR-34c-5p	ENSGALG00000033453
gga-miR-146c-3p	ENSGALG00000033453
gga-miR-9-5p	ENSGALG00000033453
gga-miR-130b-3p	ENSGALG00000033453
gga-miR-200a-3p	ENSGALG00000033453
gga-miR-1729-5p	ENSGALG00000033453
gga-miR-223	ENSGALG00000033453
gga-miR-10a-5p	ENSGALG00000039355
gga-let-7j-3p	ENSGALG00000039355
gga-miR-217-5p	ENSGALG00000039355
gga-miR-499-5p	ENSGALG00000039355
gga-miR-365b-5p	ENSGALG00000038580
gga-miR-217-5p	ENSGALG00000038580
gga-miR-203a	ENSGALG00000038580
gga-miR-449a	ENSGALG00000038580
gga-miR-200b-3p	ENSGALG00000038580
gga-miR-200a-5p	ENSGALG00000038580
gga-miR-34c-3p	ENSGALG00000038580
gga-miR-9-5p	ENSGALG00000038580
gga-miR-29b-3p	ENSGALG00000038580
gga-miR-499-5p	ENSGALG00000038580
gga-miR-200b-5p	ENSGALG00000038580
gga-miR-125b-5p	ENSGALG00000038580
gga-miR-34b-5p	ENSGALG00000038580
gga-miR-499-3p	ENSGALG00000038580
gga-miR-133a-5p	ENSGALG00000038580
gga-miR-204	ENSGALG00000038580
gga-miR-146c-3p	ENSGALG00000038580
gga-miR-34c-5p	ENSGALG00000038580
gga-miR-122-5p	ENSGALG00000038580
gga-miR-429-3p	ENSGALG00000038580
gga-miR-1744-3p	ENSGALG00000038580
gga-miR-34b-3p	ENSGALG00000038580
gga-miR-155	ENSGALG00000038580
gga-miR-375	ENSGALG00000038580
gga-miR-454-3p	ENSGALG00000038580
gga-miR-200a-3p	ENSGALG00000038580
gga-miR-130b-3p	ENSGALG00000038580
gga-miR-34c-5p	ENSGALG00000039246
gga-miR-9-5p	ENSGALG00000039246
gga-miR-449a	ENSGALG00000039246
gga-miR-34b-5p	ENSGALG00000039246
gga-miR-204	ENSGALG00000039246
gga-miR-29b-3p	ENSGALG00000047057
gga-miR-1744-3p	ENSGALG00000047057
gga-miR-454-3p	ENSGALG00000047057
gga-miR-133a-5p	ENSGALG00000047057
gga-miR-155	ENSGALG00000047057
gga-miR-130b-3p	ENSGALG00000047057
gga-miR-1a-3p	ENSGALG00000047735
gga-miR-200a-3p	ENSGALG00000047735
gga-miR-146c-3p	ENSGALG00000047735
gga-miR-1b-3p	ENSGALG00000047735
gga-miR-499-3p	ENSGALG00000047735
gga-miR-206	ENSGALG00000047735
gga-miR-194	ENSGALG00000047735
gga-miR-375	ENSGALG00000054878
gga-miR-187-3p	ENSGALG00000054878
gga-let-7j-3p	ENSGALG00000054878
gga-miR-200a-5p	ENSGALG00000054878
gga-miR-29b-3p	ENSGALG00000054878
gga-miR-146c-3p	ENSGALG00000054878
gga-miR-133a-5p	ENSGALG00000054878
gga-miR-10a-5p	ENSGALG00000054938
gga-miR-204	ENSGALG00000054938
gga-miR-200a-5p	ENSGALG00000054938
gga-miR-200a-3p	ENSGALG00000054938
gga-miR-365b-5p	ENSGALG00000054938
gga-miR-223	ENSGALG00000054938
gga-miR-1744-3p	ENSGALG00000054938
gga-miR-200b-5p	ENSGALG00000054938
gga-miR-203a	ENSGALG00000054938
gga-miR-202-5p	ENSGALG00000054938
gga-miR-200b-3p	ENSGALG00000054938
gga-miR-204	ENSGALG00000047334
gga-miR-365b-5p	ENSGALG00000047334
gga-miR-203a	ENSGALG00000047334
gga-miR-29b-3p	ENSGALG00000047334
gga-miR-200b-5p	ENSGALG00000047334
gga-miR-133a-3p	ENSGALG00000050232
gga-miR-204	ENSGALG00000050232
gga-miR-125b-5p	ENSGALG00000050232
gga-miR-122-5p	ENSGALG00000050232
gga-miR-375	ENSGALG00000050232
gga-miR-133b	ENSGALG00000050232
gga-miR-133c-3p	ENSGALG00000050232
gga-miR-133a-5p	ENSGALG00000054934
gga-miR-34c-3p	ENSGALG00000054934
gga-miR-125b-5p	ENSGALG00000054934
gga-miR-31-5p	ENSGALG00000054934
gga-miR-200b-3p	ENSGALG00000051658
gga-miR-203a	ENSGALG00000051658
gga-miR-200a-3p	ENSGALG00000051658
gga-miR-3531-5p	ENSGALG00000051658
gga-miR-200b-5p	ENSGALG00000051658
gga-miR-34b-5p	ENSGALG00000051658
gga-miR-200a-5p	ENSGALG00000051658
gga-miR-429-3p	ENSGALG00000051658
gga-miR-217-5p	ENSGALG00000053409
gga-miR-29b-3p	ENSGALG00000053409
gga-miR-10a-5p	ENSGALG00000053409
gga-miR-146c-3p	ENSGALG00000053409
gga-miR-122-5p	ENSGALG00000053409
gga-miR-460b-5p	ENSGALG00000053409
gga-miR-34b-5p	ENSGALG00000051420
gga-miR-217-5p	ENSGALG00000051420
gga-miR-200a-3p	ENSGALG00000051420
gga-miR-1a-3p	ENSGALG00000053621
gga-miR-1729-5p	ENSGALG00000053621
gga-miR-206	ENSGALG00000053621
gga-miR-1b-3p	ENSGALG00000053621
gga-miR-460b-5p	ENSGALG00000053621
gga-miR-460b-5p	ENSGALG00000052224
gga-miR-203a	ENSGALG00000052224
gga-miR-10a-5p	ENSGALG00000052224
gga-miR-1744-3p	ENSGALG00000052224
gga-miR-3531-5p	ENSGALG00000052224
gga-miR-34c-5p	ENSGALG00000052224
gga-miR-200a-3p	ENSGALG00000052224
gga-miR-449a	ENSGALG00000052224
gga-miR-203a	ENSGALG00000042431
gga-miR-187-3p	ENSGALG00000042431
gga-miR-3531-5p	ENSGALG00000042431
gga-miR-429-3p	ENSGALG00000042431
gga-miR-155	ENSGALG00000042431
gga-miR-1729-5p	ENSGALG00000054601
gga-miR-1b-3p	ENSGALG00000054601
gga-miR-1a-3p	ENSGALG00000054601
gga-miR-194	ENSGALG00000054601
gga-miR-29b-3p	ENSGALG00000054601
gga-miR-454-3p	ENSGALG00000054601
gga-miR-130b-3p	ENSGALG00000054601
gga-miR-499-5p	ENSGALG00000054601
gga-miR-206	ENSGALG00000054601
gga-miR-155	ENSGALG00000054601
gga-miR-203a	ENSGALG00000054601
gga-miR-460b-5p	ENSGALG00000054601
gga-miR-200b-5p	ENSGALG00000054601
gga-miR-200a-3p	ENSGALG00000042431
gga-miR-125b-5p	ENSGALG00000042431
gga-miR-223	ENSGALG00000048674
gga-miR-202-5p	ENSGALG00000048674
gga-let-7j-3p	ENSGALG00000048674
gga-miR-9-5p	ENSGALG00000048674
gga-miR-365b-5p	ENSGALG00000052830
gga-miR-9-5p	ENSGALG00000047342
gga-miR-200b-5p	ENSGALG00000047342
gga-miR-200b-3p	ENSGALG00000047342
gga-miR-217-5p	ENSGALG00000047342
gga-miR-454-3p	ENSGALG00000047342
gga-miR-429-3p	ENSGALG00000047342
gga-miR-1744-3p	ENSGALG00000047342
gga-miR-499-3p	ENSGALG00000047342
gga-miR-155	ENSGALG00000047342
gga-miR-375	ENSGALG00000047342
gga-miR-1684a-3p	ENSGALG00000047342
gga-miR-223	ENSGALG00000047342
gga-miR-130b-3p	ENSGALG00000047342
gga-miR-122-3p	ENSGALG00000047342
gga-miR-203a	ENSGALG00000047342
gga-miR-194	ENSGALG00000047342
gga-miR-204	ENSGALG00000047342
gga-miR-146c-3p	ENSGALG00000047342
gga-miR-34b-5p	ENSGALG00000047342
gga-miR-133a-5p	ENSGALG00000047342
gga-miR-460b-5p	ENSGALG00000047342
gga-miR-3531-5p	ENSGALG00000047342
gga-miR-34c-5p	ENSGALG00000048352
gga-miR-203a	ENSGALG00000048352
gga-miR-3531-5p	ENSGALG00000048352
gga-miR-365b-5p	ENSGALG00000048352
gga-miR-217-5p	ENSGALG00000048352
gga-miR-499-3p	ENSGALG00000048352
gga-miR-200b-5p	ENSGALG00000048352
gga-miR-449a	ENSGALG00000048352
gga-miR-200a-3p	ENSGALG00000054788
gga-miR-200b-3p	ENSGALG00000054788
gga-miR-1684a-3p	ENSGALG00000054788
gga-miR-429-3p	ENSGALG00000054788
gga-miR-460b-5p	ENSGALG00000054788
gga-let-7j-3p	ENSGALG00000054788
gga-miR-449a	ENSGALG00000054788
gga-miR-34b-5p	ENSGALG00000054788
gga-miR-203a	ENSGALG00000054788
gga-miR-34b-5p	ENSGALG00000053290
gga-miR-365b-5p	ENSGALG00000053290
gga-miR-3531-5p	ENSGALG00000053290
gga-miR-375	ENSGALG00000053290
gga-miR-202-5p	ENSGALG00000053290
gga-let-7j-3p	ENSGALG00000050525
gga-miR-217-5p	ENSGALG00000050525
gga-miR-200b-3p	ENSGALG00000050525
gga-miR-203a	ENSGALG00000050525
gga-miR-454-3p	ENSGALG00000050525
gga-miR-200a-3p	ENSGALG00000050525
gga-miR-449a	ENSGALG00000050525
gga-miR-1684a-3p	ENSGALG00000050525
gga-miR-130b-3p	ENSGALG00000050525
gga-miR-499-3p	ENSGALG00000050525
gga-miR-429-3p	ENSGALG00000050525
gga-miR-146c-3p	ENSGALG00000050525
gga-miR-34b-5p	ENSGALG00000050525
gga-miR-155	ENSGALG00000050525
gga-miR-34c-3p	ENSGALG00000050525
gga-miR-34c-5p	ENSGALG00000050525
gga-miR-34b-3p	ENSGALG00000050525
gga-miR-29b-3p	ENSGALG00000050525
gga-miR-200b-3p	ENSGALG00000054544
gga-miR-499-3p	ENSGALG00000054544
gga-miR-194	ENSGALG00000054544
gga-miR-9-5p	ENSGALG00000054544
gga-miR-130b-3p	ENSGALG00000054544
gga-miR-449a	ENSGALG00000054544
gga-miR-34b-5p	ENSGALG00000054544
gga-miR-1a-3p	ENSGALG00000054544
gga-miR-365b-5p	ENSGALG00000054544
gga-miR-3531-5p	ENSGALG00000054544
gga-miR-31-5p	ENSGALG00000054544
gga-miR-34b-3p	ENSGALG00000054544
gga-miR-125b-5p	ENSGALG00000054544
gga-miR-10a-5p	ENSGALG00000054544
gga-let-7j-3p	ENSGALG00000054544
gga-miR-200a-3p	ENSGALG00000054544
gga-miR-200b-5p	ENSGALG00000054544
gga-miR-204	ENSGALG00000054544
gga-miR-1744-3p	ENSGALG00000054544
gga-miR-133b	ENSGALG00000054544
gga-miR-203a	ENSGALG00000054544
gga-miR-1729-5p	ENSGALG00000054544
gga-miR-155	ENSGALG00000054544
gga-miR-454-3p	ENSGALG00000054544
gga-miR-429-3p	ENSGALG00000054544
gga-miR-133a-5p	ENSGALG00000054544
gga-miR-34c-3p	ENSGALG00000054544
gga-miR-34c-5p	ENSGALG00000054544
gga-miR-215-5p	ENSGALG00000054544
gga-miR-499-5p	ENSGALG00000054544
gga-miR-1684a-3p	ENSGALG00000054544
gga-miR-187-3p	ENSGALG00000054544
gga-miR-460b-5p	ENSGALG00000054544
gga-miR-29b-3p	ENSGALG00000054544
gga-miR-196-5p	ENSGALG00000054544
gga-miR-202-5p	ENSGALG00000054544
gga-miR-133c-3p	ENSGALG00000054544
gga-miR-133a-3p	ENSGALG00000054544
gga-miR-200a-5p	ENSGALG00000054544
gga-miR-133a-5p	ENSGALG00000048660
gga-miR-215-5p	ENSGALG00000048660
gga-miR-194	ENSGALG00000048660
gga-miR-146c-3p	ENSGALG00000048660
gga-miR-454-3p	ENSGALG00000048660
gga-miR-130b-3p	ENSGALG00000048660
gga-miR-3531-5p	ENSGALG00000048660
gga-miR-200b-5p	ENSGALG00000048660
gga-miR-203a	ENSGALG00000051288
gga-miR-202-5p	ENSGALG00000051288
gga-miR-449a	ENSGALG00000051288
gga-let-7j-3p	ENSGALG00000051288
gga-miR-499-5p	ENSGALG00000051288
gga-miR-1744-3p	ENSGALG00000051288
gga-miR-34c-5p	ENSGALG00000051288
gga-miR-130b-3p	ENSGALG00000047735
gga-miR-3531-5p	ENSGALG00000047735
gga-miR-1744-3p	ENSGALG00000047735
gga-miR-375	ENSGALG00000047735
gga-miR-133a-5p	ENSGALG00000047735
gga-miR-454-3p	ENSGALG00000047735
gga-miR-460b-5p	ENSGALG00000047735
gga-miR-155	ENSGALG00000047735
gga-miR-122-5p	ENSGALG00000047735
gga-miR-203a	ENSGALG00000047735
gga-miR-1684a-3p	ENSGALG00000047735
gga-miR-202-5p	ENSGALG00000047735
gga-miR-200b-5p	ENSGALG00000050525
gga-miR-204	ENSGALG00000054527
gga-miR-223	ENSGALG00000054527
gga-miR-122-5p	ENSGALG00000054527
gga-let-7j-3p	ENSGALG00000054527
gga-miR-375	ENSGALG00000047409
gga-miR-204	ENSGALG00000047409
gga-miR-196-5p	ENSGALG00000047409
gga-miR-1744-3p	ENSGALG00000047409
gga-miR-460b-5p	ENSGALG00000047409
gga-miR-202-5p	ENSGALG00000047409
gga-miR-187-3p	ENSGALG00000047409
gga-miR-10a-5p	ENSGALG00000047409
gga-miR-203a	ENSGALG00000046680
gga-miR-454-3p	ENSGALG00000046680
gga-miR-130b-3p	ENSGALG00000046680
gga-miR-1b-3p	ENSGALG00000046680
gga-miR-217-5p	ENSGALG00000046680
gga-miR-200b-3p	ENSGALG00000046680
gga-miR-34b-5p	ENSGALG00000046680
gga-miR-1a-3p	ENSGALG00000046680
gga-miR-196-5p	ENSGALG00000046680
gga-miR-206	ENSGALG00000046680
gga-miR-429-3p	ENSGALG00000046680
gga-miR-460b-5p	ENSGALG00000046680
gga-miR-194	ENSGALG00000051245
gga-miR-1b-3p	ENSGALG00000051245
gga-miR-223	ENSGALG00000051245
gga-miR-1a-3p	ENSGALG00000051245
gga-let-7j-3p	ENSGALG00000051245
gga-miR-203a	ENSGALG00000051245
gga-miR-206	ENSGALG00000051245
gga-miR-34c-5p	ENSGALG00000051245
gga-miR-429-3p	ENSGALG00000051245
gga-miR-3531-5p	ENSGALG00000051245
gga-miR-122-5p	ENSGALG00000051245
gga-miR-200b-3p	ENSGALG00000051245
gga-miR-34b-5p	ENSGALG00000051245
gga-miR-29b-3p	ENSGALG00000051245
gga-miR-1b-3p	ENSGALG00000047686
gga-miR-187-3p	ENSGALG00000047686
gga-miR-10a-5p	ENSGALG00000047686
gga-miR-29b-3p	ENSGALG00000047686
gga-miR-122-5p	ENSGALG00000047686
gga-miR-155	ENSGALG00000047686
gga-miR-454-3p	ENSGALG00000047686
gga-miR-130b-3p	ENSGALG00000047686
gga-miR-1a-3p	ENSGALG00000047686
gga-miR-125b-5p	ENSGALG00000047686
gga-miR-206	ENSGALG00000047686
gga-miR-3531-5p	ENSGALG00000047686
gga-miR-499-3p	ENSGALG00000047686
gga-miR-460b-5p	ENSGALG00000047686
gga-miR-202-5p	ENSGALG00000047686
gga-miR-499-5p	ENSGALG00000047769
gga-miR-203a	ENSGALG00000047769
gga-miR-196-5p	ENSGALG00000047769
gga-miR-200a-3p	ENSGALG00000047769
gga-miR-34b-5p	ENSGALG00000047769
gga-miR-1744-3p	ENSGALG00000047769
gga-miR-9-5p	ENSGALG00000047769
gga-miR-122-5p	ENSGALG00000047769
gga-miR-200b-5p	ENSGALG00000048482
gga-miR-133a-3p	ENSGALG00000048482
gga-miR-206	ENSGALG00000048482
gga-miR-3531-5p	ENSGALG00000048482
gga-miR-203a	ENSGALG00000048482
gga-miR-200a-3p	ENSGALG00000048482
gga-miR-133b	ENSGALG00000048482
gga-miR-499-5p	ENSGALG00000048482
gga-miR-215-5p	ENSGALG00000048482
gga-miR-34c-3p	ENSGALG00000048482
gga-miR-34b-3p	ENSGALG00000048482
gga-miR-196-5p	ENSGALG00000048482
gga-miR-454-3p	ENSGALG00000048482
gga-miR-155	ENSGALG00000048482
gga-miR-1b-3p	ENSGALG00000048482
gga-miR-133c-3p	ENSGALG00000048482
gga-miR-1a-3p	ENSGALG00000048482
gga-miR-217-5p	ENSGALG00000048482
gga-miR-146c-3p	ENSGALG00000048482
gga-miR-365b-5p	ENSGALG00000048482
gga-miR-133a-3p	ENSGALG00000051380
gga-miR-9-5p	ENSGALG00000051380
gga-miR-133b	ENSGALG00000051380
gga-miR-133c-3p	ENSGALG00000051380
gga-miR-203a	ENSGALG00000051380
gga-miR-204	ENSGALG00000052618
gga-miR-1744-3p	ENSGALG00000052618
gga-miR-122-5p	ENSGALG00000052618
gga-miR-10a-5p	ENSGALG00000052618
gga-miR-3531-5p	ENSGALG00000052618
gga-miR-365b-5p	ENSGALG00000052618
gga-miR-1684a-3p	ENSGALG00000052618
gga-miR-499-5p	ENSGALG00000052618
gga-miR-200a-3p	ENSGALG00000053666
gga-miR-204	ENSGALG00000053666
gga-miR-34c-5p	ENSGALG00000053666
gga-miR-1744-3p	ENSGALG00000053666
gga-miR-34b-3p	ENSGALG00000053666
gga-miR-449a	ENSGALG00000053666
gga-miR-10a-5p	ENSGALG00000053666
gga-miR-34b-5p	ENSGALG00000053666
gga-miR-3531-5p	ENSGALG00000053666
gga-miR-34c-3p	ENSGALG00000053666
gga-miR-196-5p	ENSGALG00000053666
gga-miR-202-5p	ENSGALG00000053666
gga-miR-200a-5p	ENSGALG00000053666
gga-miR-187-3p	ENSGALG00000049085
gga-miR-203a	ENSGALG00000049085
gga-miR-200b-5p	ENSGALG00000050916
gga-miR-454-3p	ENSGALG00000050916
gga-miR-130b-3p	ENSGALG00000050916
gga-miR-9-5p	ENSGALG00000050916
gga-miR-194	ENSGALG00000050916
gga-miR-375	ENSGALG00000050916
gga-miR-34b-5p	ENSGALG00000050916
gga-miR-223	ENSGALG00000050916
gga-miR-196-5p	ENSGALG00000051720
gga-miR-365b-5p	ENSGALG00000051720
gga-miR-499-3p	ENSGALG00000051720
gga-miR-429-3p	ENSGALG00000051720
gga-miR-200b-3p	ENSGALG00000051720
gga-miR-202-5p	ENSGALG00000051720
gga-miR-1744-3p	ENSGALG00000051720
gga-miR-146c-3p	ENSGALG00000051720
gga-miR-365-3p	ENSGALG00000051720
gga-miR-10a-5p	ENSGALG00000051720
gga-miR-155	ENSGALG00000051720
gga-miR-204	ENSGALG00000051720
gga-miR-200a-5p	ENSGALG00000051720
gga-miR-194	ENSGALG00000052206
gga-miR-9-5p	ENSGALG00000052206
gga-miR-130b-3p	ENSGALG00000052206
gga-miR-454-3p	ENSGALG00000052206
gga-miR-365b-5p	ENSGALG00000052206
gga-miR-202-5p	ENSGALG00000052206
gga-miR-200b-5p	ENSGALG00000046680
gga-miR-34b-3p	ENSGALG00000047747
gga-miR-460b-5p	ENSGALG00000047747
gga-miR-454-3p	ENSGALG00000047747
gga-miR-499-5p	ENSGALG00000047747
gga-miR-200b-5p	ENSGALG00000047747
gga-miR-200a-3p	ENSGALG00000047747
gga-miR-196-5p	ENSGALG00000047747
gga-miR-223	ENSGALG00000047747
gga-miR-10a-5p	ENSGALG00000047747
gga-miR-1684a-3p	ENSGALG00000047747
gga-miR-3531-5p	ENSGALG00000047747
gga-miR-499-3p	ENSGALG00000047747
gga-miR-133a-5p	ENSGALG00000047747
gga-miR-133a-3p	ENSGALG00000047747
gga-miR-217-5p	ENSGALG00000047747
gga-miR-146c-3p	ENSGALG00000047747
gga-miR-133c-3p	ENSGALG00000047747
gga-miR-365b-5p	ENSGALG00000047747
gga-miR-34c-5p	ENSGALG00000047747
gga-let-7j-3p	ENSGALG00000047747
gga-miR-204	ENSGALG00000047747
gga-miR-1744-3p	ENSGALG00000047747
gga-miR-34c-3p	ENSGALG00000047747
gga-miR-202-5p	ENSGALG00000047747
gga-miR-1b-3p	ENSGALG00000047747
gga-miR-215-5p	ENSGALG00000047747
gga-miR-1a-3p	ENSGALG00000047747
gga-miR-429-3p	ENSGALG00000047747
gga-miR-133b	ENSGALG00000047747
gga-miR-9-5p	ENSGALG00000047747
gga-miR-449a	ENSGALG00000047747
gga-miR-1729-5p	ENSGALG00000047747
gga-miR-122-5p	ENSGALG00000047747
gga-miR-200b-3p	ENSGALG00000047747
gga-miR-125b-5p	ENSGALG00000047747
gga-miR-34b-5p	ENSGALG00000047747
gga-miR-206	ENSGALG00000047747
gga-miR-194	ENSGALG00000047747
gga-miR-130b-3p	ENSGALG00000047747
gga-miR-203a	ENSGALG00000047747
gga-miR-155	ENSGALG00000047747
gga-miR-29b-3p	ENSGALG00000047747
gga-miR-200a-5p	ENSGALG00000047747
gga-miR-31-5p	ENSGALG00000047747
gga-miR-217-5p	ENSGALG00000051070
gga-miR-1684a-3p	ENSGALG00000051070
gga-miR-184-3p	ENSGALG00000051070
gga-miR-1a-3p	ENSGALG00000051070
gga-miR-204	ENSGALG00000051070
gga-miR-200a-3p	ENSGALG00000051070
gga-miR-31-5p	ENSGALG00000047398
gga-miR-202-5p	ENSGALG00000047398
gga-miR-206	ENSGALG00000047398
gga-miR-454-3p	ENSGALG00000047398
gga-miR-122-5p	ENSGALG00000047398
gga-miR-1b-3p	ENSGALG00000047398
gga-miR-204	ENSGALG00000047398
gga-miR-1a-3p	ENSGALG00000047398
gga-miR-122-3p	ENSGALG00000047398
gga-miR-365b-5p	ENSGALG00000053148
gga-miR-429-3p	ENSGALG00000053148
gga-miR-34b-5p	ENSGALG00000053148
gga-miR-200b-3p	ENSGALG00000053148
gga-miR-1729-5p	ENSGALG00000053148
gga-miR-196-5p	ENSGALG00000053148
gga-miR-122-5p	ENSGALG00000053148
gga-miR-217-5p	ENSGALG00000053148
gga-miR-31-5p	ENSGALG00000053148
gga-miR-202-5p	ENSGALG00000053148
gga-miR-200b-3p	ENSGALG00000048597
gga-miR-460b-5p	ENSGALG00000048597
gga-miR-499-3p	ENSGALG00000048597
gga-miR-1744-3p	ENSGALG00000048597
gga-miR-34c-5p	ENSGALG00000048597
gga-miR-449a	ENSGALG00000048597
gga-miR-155	ENSGALG00000048597
gga-miR-223	ENSGALG00000048597
gga-miR-196-5p	ENSGALG00000048597
gga-miR-202-5p	ENSGALG00000048597
gga-miR-200a-5p	ENSGALG00000048597
gga-miR-429-3p	ENSGALG00000048597
gga-miR-1729-5p	ENSGALG00000048597
gga-miR-454-3p	ENSGALG00000048597
gga-miR-34b-3p	ENSGALG00000048597
gga-miR-217-5p	ENSGALG00000048597
gga-miR-200a-3p	ENSGALG00000048597
gga-miR-34b-5p	ENSGALG00000048597
gga-miR-34c-3p	ENSGALG00000048597
gga-miR-10a-5p	ENSGALG00000053182
gga-miR-1684a-3p	ENSGALG00000053182
gga-miR-34c-5p	ENSGALG00000053182
gga-miR-449a	ENSGALG00000053182
gga-miR-194	ENSGALG00000053182
gga-miR-122-5p	ENSGALG00000053182
gga-miR-34b-5p	ENSGALG00000053182
gga-miR-34b-5p	ENSGALG00000047014
gga-miR-217-5p	ENSGALG00000047014
gga-miR-125b-5p	ENSGALG00000047014
gga-miR-9-5p	ENSGALG00000047014
gga-miR-203a	ENSGALG00000047014
gga-miR-196-5p	ENSGALG00000047014
gga-let-7j-3p	ENSGALG00000047014
gga-miR-200a-3p	ENSGALG00000047014
gga-miR-204	ENSGALG00000047014
gga-miR-130b-3p	ENSGALG00000053869
gga-miR-365b-5p	ENSGALG00000053869
gga-miR-203a	ENSGALG00000053869
gga-miR-3531-5p	ENSGALG00000053869
gga-miR-215-5p	ENSGALG00000053869
gga-miR-217-5p	ENSGALG00000053869
gga-miR-31-5p	ENSGALG00000053869
gga-miR-1729-5p	ENSGALG00000053869
gga-let-7j-3p	ENSGALG00000053869
gga-miR-454-3p	ENSGALG00000053869
gga-miR-155	ENSGALG00000053869
gga-miR-204	ENSGALG00000053869
gga-miR-203a	ENSGALG00000050843
gga-miR-34c-3p	ENSGALG00000050843
gga-miR-200a-3p	ENSGALG00000050843
gga-miR-9-5p	ENSGALG00000053676
gga-miR-133c-3p	ENSGALG00000053676
gga-miR-133b	ENSGALG00000053676
gga-miR-133a-3p	ENSGALG00000053676
gga-miR-202-5p	ENSGALG00000053676
gga-miR-29b-3p	ENSGALG00000048807
gga-miR-1684a-3p	ENSGALG00000048807
gga-miR-187-3p	ENSGALG00000048807
gga-miR-146c-3p	ENSGALG00000048807
gga-miR-365b-5p	ENSGALG00000048807
gga-miR-200b-5p	ENSGALG00000051353
gga-miR-125b-5p	ENSGALG00000052102
gga-miR-10a-5p	ENSGALG00000052102
gga-miR-1a-3p	ENSGALG00000052102
gga-miR-1b-3p	ENSGALG00000052102
gga-miR-34b-5p	ENSGALG00000052102
gga-miR-200a-5p	ENSGALG00000052102
gga-miR-133a-5p	ENSGALG00000052102
gga-miR-200a-3p	ENSGALG00000052102
gga-miR-31-5p	ENSGALG00000052102
gga-miR-460b-5p	ENSGALG00000052102
gga-miR-200b-5p	ENSGALG00000052102
gga-miR-206	ENSGALG00000052102
gga-miR-449a	ENSGALG00000046680
gga-miR-499-3p	ENSGALG00000046680
gga-miR-31-5p	ENSGALG00000046680
gga-miR-122-3p	ENSGALG00000046680
gga-miR-155	ENSGALG00000046680
gga-miR-454-3p	ENSGALG00000052133
gga-miR-130b-3p	ENSGALG00000052133
gga-miR-196-5p	ENSGALG00000052133
gga-let-7j-3p	ENSGALG00000051887
gga-miR-130b-3p	ENSGALG00000051887
gga-miR-454-3p	ENSGALG00000051887
gga-miR-122-5p	ENSGALG00000051887
gga-miR-99a-5p	ENSGALG00000051887
gga-miR-202-5p	ENSGALG00000051887
gga-miR-31-5p	ENSGALG00000051477
gga-miR-200a-3p	ENSGALG00000051477
gga-miR-200b-3p	ENSGALG00000051477
gga-miR-365b-5p	ENSGALG00000051477
gga-miR-499-5p	ENSGALG00000051477
gga-miR-187-3p	ENSGALG00000051477
gga-miR-196-5p	ENSGALG00000051477
gga-miR-203a	ENSGALG00000051477
gga-miR-9-5p	ENSGALG00000051477
gga-miR-429-3p	ENSGALG00000051477
gga-miR-146c-3p	ENSGALG00000051477
gga-miR-217-5p	ENSGALG00000051477
gga-let-7j-3p	ENSGALG00000048405
gga-miR-133a-5p	ENSGALG00000048405
gga-miR-1a-3p	ENSGALG00000048405
gga-miR-206	ENSGALG00000048405
gga-miR-9-5p	ENSGALG00000048405
gga-miR-1b-3p	ENSGALG00000048405
gga-miR-155	ENSGALG00000048405
gga-miR-202-5p	ENSGALG00000048405
gga-miR-1744-3p	ENSGALG00000048405
gga-miR-31-5p	ENSGALG00000048405
gga-miR-146c-3p	ENSGALG00000054354
gga-miR-187-3p	ENSGALG00000054354
gga-miR-133a-5p	ENSGALG00000054354
gga-miR-200a-5p	ENSGALG00000054354
gga-miR-29b-3p	ENSGALG00000054354
gga-let-7j-3p	ENSGALG00000054354
gga-miR-460b-5p	ENSGALG00000054354
gga-miR-196-5p	ENSGALG00000054506
gga-miR-449a	ENSGALG00000054506
gga-miR-9-5p	ENSGALG00000054506
gga-miR-365-3p	ENSGALG00000054506
gga-miR-203a	ENSGALG00000054506
gga-miR-200a-3p	ENSGALG00000054506
gga-miR-202-5p	ENSGALG00000054506
gga-miR-146c-3p	ENSGALG00000054506
gga-miR-133c-3p	ENSGALG00000054506
gga-miR-460b-5p	ENSGALG00000054506
gga-miR-1744-3p	ENSGALG00000054506
gga-miR-454-3p	ENSGALG00000054506
gga-miR-133a-5p	ENSGALG00000054506
gga-miR-125b-5p	ENSGALG00000054506
gga-miR-34c-5p	ENSGALG00000054506
gga-miR-133a-3p	ENSGALG00000054506
gga-miR-204	ENSGALG00000054506
gga-miR-31-5p	ENSGALG00000054506
gga-miR-34b-3p	ENSGALG00000054506
gga-miR-34c-3p	ENSGALG00000054506
gga-miR-29b-3p	ENSGALG00000054506
gga-miR-375	ENSGALG00000054506
gga-miR-99a-5p	ENSGALG00000054506
gga-miR-1a-3p	ENSGALG00000054506
gga-miR-155	ENSGALG00000054506
gga-miR-34b-5p	ENSGALG00000054506
gga-miR-200a-5p	ENSGALG00000054506
gga-miR-130b-3p	ENSGALG00000054506
gga-miR-122-5p	ENSGALG00000054506
gga-miR-215-5p	ENSGALG00000054506
gga-miR-133b	ENSGALG00000054506
gga-miR-3531-5p	ENSGALG00000054506
gga-miR-10a-5p	ENSGALG00000054506
gga-miR-200a-3p	ENSGALG00000053982
gga-miR-449a	ENSGALG00000053982
gga-miR-365b-5p	ENSGALG00000053982
gga-miR-155	ENSGALG00000053982
gga-miR-146c-3p	ENSGALG00000053982
gga-miR-460b-5p	ENSGALG00000053982
gga-miR-34c-5p	ENSGALG00000053982
gga-miR-200b-3p	ENSGALG00000053982
gga-miR-194	ENSGALG00000053982
gga-miR-1744-3p	ENSGALG00000053982
gga-miR-1684a-3p	ENSGALG00000053982
gga-miR-429-3p	ENSGALG00000053982
gga-miR-499-3p	ENSGALG00000053982
gga-miR-29b-3p	ENSGALG00000053982
gga-miR-223	ENSGALG00000053982
gga-miR-1729-5p	ENSGALG00000053982
gga-miR-9-5p	ENSGALG00000049965
gga-miR-130b-3p	ENSGALG00000049965
gga-miR-460b-5p	ENSGALG00000049965
gga-miR-499-5p	ENSGALG00000049965
gga-miR-200b-5p	ENSGALG00000049965
gga-miR-99a-5p	ENSGALG00000049965
gga-miR-122-5p	ENSGALG00000049965
gga-miR-454-3p	ENSGALG00000049965
gga-miR-31-5p	ENSGALG00000049965
gga-miR-499-3p	ENSGALG00000049965
gga-miR-365b-5p	ENSGALG00000047667
gga-miR-449a	ENSGALG00000047667
gga-miR-200a-5p	ENSGALG00000047667
gga-miR-34c-5p	ENSGALG00000047667
gga-miR-34b-5p	ENSGALG00000047667
gga-miR-200a-3p	ENSGALG00000047667
gga-miR-196-5p	ENSGALG00000047667
gga-miR-200a-5p	ENSGALG00000054527
gga-miR-31-5p	ENSGALG00000054527
gga-miR-202-5p	ENSGALG00000054527
gga-miR-3531-5p	ENSGALG00000054527
gga-miR-29b-3p	ENSGALG00000054527
gga-miR-460b-5p	ENSGALG00000054527
gga-miR-34c-5p	ENSGALG00000052744
gga-miR-499-3p	ENSGALG00000052744
gga-miR-203a	ENSGALG00000052744
gga-miR-34b-5p	ENSGALG00000052744
gga-miR-217-5p	ENSGALG00000052744
gga-miR-449a	ENSGALG00000052744
gga-miR-133a-5p	ENSGALG00000052744
gga-miR-1729-5p	ENSGALG00000053182
gga-miR-133a-5p	ENSGALG00000053182
gga-miR-29b-3p	ENSGALG00000053182
gga-miR-200a-3p	ENSGALG00000053182
gga-miR-1744-3p	ENSGALG00000053182
gga-miR-429-3p	ENSGALG00000054369
gga-miR-206	ENSGALG00000054369
gga-miR-200b-3p	ENSGALG00000054369
gga-miR-1b-3p	ENSGALG00000054369
gga-miR-1a-3p	ENSGALG00000054369
gga-miR-206	ENSGALG00000050016
gga-miR-200a-3p	ENSGALG00000050016
gga-miR-29b-3p	ENSGALG00000050016
gga-miR-499-5p	ENSGALG00000050016
gga-miR-217-5p	ENSGALG00000050016
gga-miR-34b-5p	ENSGALG00000054699
gga-miR-200b-3p	ENSGALG00000054699
gga-miR-130b-3p	ENSGALG00000054699
gga-miR-215-5p	ENSGALG00000054699
gga-miR-449a	ENSGALG00000054699
gga-miR-454-3p	ENSGALG00000054699
gga-miR-217-5p	ENSGALG00000054699
gga-miR-203a	ENSGALG00000054699
gga-miR-202-5p	ENSGALG00000054699
gga-miR-460b-5p	ENSGALG00000054699
gga-miR-429-3p	ENSGALG00000054699
gga-miR-125b-5p	ENSGALG00000053621
gga-miR-155	ENSGALG00000053621
gga-miR-375	ENSGALG00000053621
gga-miR-499-3p	ENSGALG00000053621
gga-miR-34c-5p	ENSGALG00000053621
gga-miR-449a	ENSGALG00000053621
gga-miR-34b-5p	ENSGALG00000053621
gga-miR-203a	ENSGALG00000051113
gga-miR-1b-3p	ENSGALG00000051113
gga-miR-206	ENSGALG00000051113
gga-miR-133a-5p	ENSGALG00000051113
gga-miR-9-5p	ENSGALG00000051113
gga-miR-29b-3p	ENSGALG00000051113
gga-miR-1729-5p	ENSGALG00000051113
gga-miR-1a-3p	ENSGALG00000051113
gga-miR-10a-5p	ENSGALG00000051113
gga-miR-146c-3p	ENSGALG00000051113
gga-miR-34c-5p	ENSGALG00000051113
gga-miR-365b-5p	ENSGALG00000050354
gga-miR-1684a-3p	ENSGALG00000050354
gga-miR-200a-5p	ENSGALG00000050354
gga-miR-429-3p	ENSGALG00000050354
gga-miR-125b-5p	ENSGALG00000050354
gga-miR-196-5p	ENSGALG00000050354
gga-miR-130b-3p	ENSGALG00000050354
gga-miR-9-5p	ENSGALG00000050354
gga-miR-194	ENSGALG00000050354
gga-miR-34b-5p	ENSGALG00000050354
gga-miR-200b-3p	ENSGALG00000050354
gga-miR-146c-3p	ENSGALG00000050354
gga-miR-499-5p	ENSGALG00000050354
gga-let-7j-3p	ENSGALG00000050954
gga-miR-1a-3p	ENSGALG00000050954
gga-miR-200a-3p	ENSGALG00000050954
gga-miR-460b-5p	ENSGALG00000050954
gga-miR-1b-3p	ENSGALG00000050954
gga-miR-1744-3p	ENSGALG00000050954
gga-miR-1729-5p	ENSGALG00000050954
gga-miR-449a	ENSGALG00000050954
gga-miR-499-3p	ENSGALG00000050954
gga-miR-34c-5p	ENSGALG00000050954
gga-miR-200b-5p	ENSGALG00000050954
gga-miR-34c-3p	ENSGALG00000050954
gga-miR-133a-5p	ENSGALG00000050954
gga-miR-9-5p	ENSGALG00000050954
gga-miR-194	ENSGALG00000050954
gga-miR-202-5p	ENSGALG00000050954
gga-miR-217-5p	ENSGALG00000050954
gga-miR-454-3p	ENSGALG00000050954
gga-miR-196-5p	ENSGALG00000050954
gga-miR-34b-3p	ENSGALG00000050954
gga-miR-429-3p	ENSGALG00000050954
gga-miR-365b-5p	ENSGALG00000050954
gga-miR-223	ENSGALG00000050954
gga-miR-34b-5p	ENSGALG00000050954
gga-miR-200b-3p	ENSGALG00000050954
gga-miR-146c-3p	ENSGALG00000050954
gga-miR-1684a-3p	ENSGALG00000050954
gga-miR-206	ENSGALG00000050954
gga-miR-3531-5p	ENSGALG00000050954
gga-miR-203a	ENSGALG00000050954
gga-miR-130b-3p	ENSGALG00000050954
gga-miR-31-5p	ENSGALG00000050954
gga-miR-200a-5p	ENSGALG00000050954
gga-miR-204	ENSGALG00000050954
gga-miR-499-5p	ENSGALG00000050954
gga-miR-365b-5p	ENSGALG00000046816
gga-miR-34c-5p	ENSGALG00000046816
gga-miR-449a	ENSGALG00000046816
gga-miR-34b-5p	ENSGALG00000046816
gga-miR-29b-3p	ENSGALG00000046816
gga-miR-1684a-3p	ENSGALG00000046816
gga-miR-122-5p	ENSGALG00000051180
gga-miR-223	ENSGALG00000051180
gga-miR-217-5p	ENSGALG00000051180
gga-miR-1744-3p	ENSGALG00000051180
gga-miR-200a-3p	ENSGALG00000051180
gga-miR-217-5p	ENSGALG00000053723
gga-miR-223	ENSGALG00000053723
gga-miR-499-5p	ENSGALG00000053723
gga-miR-34b-5p	ENSGALG00000053723
gga-miR-429-3p	ENSGALG00000053723
gga-let-7j-3p	ENSGALG00000053723
gga-miR-1744-3p	ENSGALG00000053723
gga-miR-1684a-3p	ENSGALG00000053723
gga-miR-200b-3p	ENSGALG00000053723
gga-miR-1729-5p	ENSGALG00000053723
gga-miR-133c-3p	ENSGALG00000049164
gga-miR-122-3p	ENSGALG00000049164
gga-miR-454-3p	ENSGALG00000049164
gga-miR-217-5p	ENSGALG00000049164
gga-miR-9-5p	ENSGALG00000049164
gga-miR-133b	ENSGALG00000049164
gga-miR-1a-3p	ENSGALG00000049164
gga-miR-125b-5p	ENSGALG00000049164
gga-miR-365b-5p	ENSGALG00000049164
gga-miR-29b-3p	ENSGALG00000049164
gga-miR-200b-5p	ENSGALG00000049164
gga-miR-31-5p	ENSGALG00000049164
gga-miR-215-5p	ENSGALG00000049164
gga-miR-133a-3p	ENSGALG00000049164
gga-miR-130b-3p	ENSGALG00000049164
gga-miR-365b-5p	ENSGALG00000051194
gga-miR-200a-3p	ENSGALG00000051288
gga-miR-3531-5p	ENSGALG00000051288
gga-miR-194	ENSGALG00000051288
gga-miR-130b-3p	ENSGALG00000051288
gga-miR-454-3p	ENSGALG00000051288
gga-miR-125b-5p	ENSGALG00000048797
gga-miR-196-5p	ENSGALG00000048797
gga-miR-365-3p	ENSGALG00000048797
gga-miR-9-5p	ENSGALG00000048797
gga-miR-460b-5p	ENSGALG00000048797
gga-miR-202-5p	ENSGALG00000048797
gga-miR-215-5p	ENSGALG00000051977
gga-miR-499-5p	ENSGALG00000051977
gga-miR-3531-5p	ENSGALG00000051977
gga-miR-204	ENSGALG00000051977
gga-miR-34b-3p	ENSGALG00000051977
gga-miR-200b-3p	ENSGALG00000051977
gga-miR-200a-5p	ENSGALG00000051977
gga-miR-1744-3p	ENSGALG00000051977
gga-miR-429-3p	ENSGALG00000051977
gga-miR-200b-5p	ENSGALG00000051977
gga-miR-155	ENSGALG00000051977
gga-miR-1729-5p	ENSGALG00000051977
gga-miR-499-3p	ENSGALG00000051977
gga-let-7j-3p	ENSGALG00000051977
gga-miR-31-5p	ENSGALG00000051977
gga-miR-200a-3p	ENSGALG00000051977
gga-miR-202-5p	ENSGALG00000051977
gga-miR-122-5p	ENSGALG00000051977
gga-miR-365b-5p	ENSGALG00000051977
gga-miR-194	ENSGALG00000051977
gga-miR-203a	ENSGALG00000051977
gga-miR-133a-5p	ENSGALG00000051977
gga-miR-34b-5p	ENSGALG00000051977
gga-miR-196-5p	ENSGALG00000051977
gga-miR-34c-5p	ENSGALG00000051977
gga-miR-133a-5p	ENSGALG00000052866
gga-miR-196-5p	ENSGALG00000052866
gga-miR-365b-5p	ENSGALG00000052866
gga-miR-200a-3p	ENSGALG00000052866
gga-miR-125b-5p	ENSGALG00000052866
gga-miR-1684a-3p	ENSGALG00000047409
gga-miR-122-5p	ENSGALG00000047409
gga-miR-9-5p	ENSGALG00000047409
gga-miR-203a	ENSGALG00000047409
gga-miR-200a-3p	ENSGALG00000047409
gga-miR-3531-5p	ENSGALG00000049079
gga-miR-125b-5p	ENSGALG00000049079
gga-miR-217-5p	ENSGALG00000049860
gga-miR-9-5p	ENSGALG00000049860
gga-miR-155	ENSGALG00000049860
gga-miR-1a-3p	ENSGALG00000049860
gga-miR-365b-5p	ENSGALG00000049860
gga-miR-29b-3p	ENSGALG00000049860
gga-miR-34b-5p	ENSGALG00000049860
gga-miR-200b-5p	ENSGALG00000049860
gga-miR-203a	ENSGALG00000049860
gga-miR-449a	ENSGALG00000049860
gga-miR-146c-3p	ENSGALG00000049860
gga-miR-34c-5p	ENSGALG00000049860
gga-miR-10a-5p	ENSGALG00000049860
gga-miR-122-5p	ENSGALG00000049860
gga-miR-1729-5p	ENSGALG00000049860
gga-miR-1b-3p	ENSGALG00000049860
gga-miR-499-5p	ENSGALG00000049860
gga-miR-133a-5p	ENSGALG00000049860
gga-miR-196-5p	ENSGALG00000049860
gga-miR-194	ENSGALG00000049860
gga-miR-202-5p	ENSGALG00000049860
gga-miR-454-3p	ENSGALG00000049860
gga-miR-460b-5p	ENSGALG00000049860
gga-miR-206	ENSGALG00000054333
gga-miR-3531-5p	ENSGALG00000054333
gga-miR-202-5p	ENSGALG00000054333
gga-miR-200b-3p	ENSGALG00000054333
gga-miR-203a	ENSGALG00000054333
gga-miR-204	ENSGALG00000054333
gga-miR-365b-5p	ENSGALG00000054333
gga-miR-184-3p	ENSGALG00000054333
gga-miR-133a-5p	ENSGALG00000054333
gga-miR-429-3p	ENSGALG00000054333
gga-miR-155	ENSGALG00000047108
gga-miR-449a	ENSGALG00000047108
gga-miR-1684a-3p	ENSGALG00000047108
gga-let-7j-3p	ENSGALG00000047108
gga-miR-365b-5p	ENSGALG00000047108
gga-miR-34c-5p	ENSGALG00000047108
gga-miR-3531-5p	ENSGALG00000047108
gga-miR-34b-5p	ENSGALG00000047108
gga-miR-429-3p	ENSGALG00000051380
gga-miR-200b-3p	ENSGALG00000051380
gga-miR-204	ENSGALG00000051380
gga-miR-3531-5p	ENSGALG00000051380
gga-miR-34b-5p	ENSGALG00000051380
gga-miR-200a-3p	ENSGALG00000051380
gga-miR-1744-3p	ENSGALG00000051380
gga-miR-34c-5p	ENSGALG00000051380
gga-miR-122-5p	ENSGALG00000051380
gga-miR-449a	ENSGALG00000051380
gga-miR-200a-5p	ENSGALG00000051380
gga-miR-202-5p	ENSGALG00000051380
gga-miR-194	ENSGALG00000053301
gga-miR-204	ENSGALG00000053301
gga-miR-203a	ENSGALG00000053301
gga-miR-34c-3p	ENSGALG00000053301
gga-miR-34c-5p	ENSGALG00000053301
gga-miR-34b-3p	ENSGALG00000053301
gga-miR-499-5p	ENSGALG00000053301
gga-miR-449a	ENSGALG00000053301
gga-miR-202-5p	ENSGALG00000053301
gga-miR-204	ENSGALG00000055140
gga-miR-133b	ENSGALG00000055140
gga-miR-449a	ENSGALG00000055140
gga-miR-429-3p	ENSGALG00000055140
gga-miR-133a-3p	ENSGALG00000055140
gga-miR-133c-3p	ENSGALG00000055140
gga-miR-375	ENSGALG00000055140
gga-miR-200b-3p	ENSGALG00000055140
gga-miR-9-5p	ENSGALG00000055140
gga-miR-203a	ENSGALG00000055140
gga-miR-365b-5p	ENSGALG00000055140
gga-let-7j-3p	ENSGALG00000055140
gga-miR-223	ENSGALG00000055140
gga-miR-3531-5p	ENSGALG00000055140
gga-miR-146c-3p	ENSGALG00000055140
gga-miR-217-5p	ENSGALG00000055140
gga-miR-130b-3p	ENSGALG00000055140
gga-miR-122-3p	ENSGALG00000055140
gga-miR-34c-5p	ENSGALG00000055140
gga-miR-29b-3p	ENSGALG00000055140
gga-miR-454-3p	ENSGALG00000055140
gga-miR-125b-5p	ENSGALG00000055140
gga-miR-133a-5p	ENSGALG00000049923
gga-miR-202-5p	ENSGALG00000049923
gga-miR-429-3p	ENSGALG00000049923
gga-miR-1a-3p	ENSGALG00000049923
gga-miR-9-5p	ENSGALG00000049923
gga-miR-1b-3p	ENSGALG00000049923
gga-let-7j-3p	ENSGALG00000049923
gga-miR-203a	ENSGALG00000049923
gga-miR-1744-3p	ENSGALG00000049923
gga-miR-3531-5p	ENSGALG00000049923
gga-miR-499-3p	ENSGALG00000049923
gga-miR-499-5p	ENSGALG00000049923
gga-miR-29b-3p	ENSGALG00000049923
gga-miR-200b-3p	ENSGALG00000049923
gga-miR-365b-5p	ENSGALG00000049923
gga-miR-155	ENSGALG00000049923
gga-miR-206	ENSGALG00000049923
gga-miR-34c-5p	ENSGALG00000051070
gga-miR-146c-3p	ENSGALG00000051070
gga-miR-122-5p	ENSGALG00000051070
gga-miR-29b-3p	ENSGALG00000051070
gga-miR-3531-5p	ENSGALG00000051070
gga-miR-9-5p	ENSGALG00000051070
gga-miR-499-3p	ENSGALG00000051070
gga-miR-194	ENSGALG00000051070
gga-miR-9-5p	ENSGALG00000054208
gga-miR-200a-3p	ENSGALG00000054208
gga-miR-34b-5p	ENSGALG00000054208
gga-let-7j-3p	ENSGALG00000054208
gga-miR-133a-5p	ENSGALG00000052830
gga-miR-365-3p	ENSGALG00000052830
gga-miR-202-5p	ENSGALG00000052830
gga-miR-460b-5p	ENSGALG00000052830
gga-miR-429-3p	ENSGALG00000049530
gga-miR-365b-5p	ENSGALG00000049530
gga-miR-125b-5p	ENSGALG00000049530
gga-miR-196-5p	ENSGALG00000049530
gga-miR-31-5p	ENSGALG00000049530
gga-miR-34c-3p	ENSGALG00000049530
gga-miR-200b-3p	ENSGALG00000049530
gga-miR-29b-3p	ENSGALG00000049530
gga-miR-34b-3p	ENSGALG00000049530
gga-miR-34c-5p	ENSGALG00000049965
gga-miR-449a	ENSGALG00000049965
gga-miR-146c-3p	ENSGALG00000049965
gga-miR-206	ENSGALG00000049965
gga-miR-1b-3p	ENSGALG00000049965
gga-miR-1a-3p	ENSGALG00000049965
gga-miR-1744-3p	ENSGALG00000047577
gga-miR-9-5p	ENSGALG00000047577
gga-miR-34c-3p	ENSGALG00000051288
gga-miR-365b-5p	ENSGALG00000053666
gga-miR-217-5p	ENSGALG00000053666
gga-miR-194	ENSGALG00000053666
gga-miR-9-5p	ENSGALG00000053666
gga-miR-200b-3p	ENSGALG00000053666
gga-miR-130b-3p	ENSGALG00000053666
gga-miR-454-3p	ENSGALG00000053666
gga-miR-499-3p	ENSGALG00000053666
gga-miR-155	ENSGALG00000053666
gga-miR-29b-3p	ENSGALG00000053666
gga-miR-122-5p	ENSGALG00000053666
gga-miR-429-3p	ENSGALG00000053666
gga-miR-1684a-3p	ENSGALG00000053666
gga-miR-215-5p	ENSGALG00000053474
gga-miR-34c-5p	ENSGALG00000053474
gga-let-7j-3p	ENSGALG00000053474
gga-miR-133b	ENSGALG00000053474
gga-miR-200b-5p	ENSGALG00000053474
gga-miR-194	ENSGALG00000053474
gga-miR-200a-5p	ENSGALG00000053474
gga-miR-200b-3p	ENSGALG00000053474
gga-miR-34b-3p	ENSGALG00000053474
gga-miR-1684a-3p	ENSGALG00000053474
gga-miR-206	ENSGALG00000053474
gga-miR-460b-5p	ENSGALG00000053474
gga-miR-429-3p	ENSGALG00000053474
gga-miR-155	ENSGALG00000053474
gga-miR-365b-5p	ENSGALG00000053474
gga-miR-187-3p	ENSGALG00000053474
gga-miR-34b-5p	ENSGALG00000053474
gga-miR-499-3p	ENSGALG00000053474
gga-miR-1744-3p	ENSGALG00000053474
gga-miR-9-5p	ENSGALG00000053474
gga-miR-200a-3p	ENSGALG00000053474
gga-miR-454-3p	ENSGALG00000053474
gga-miR-3531-5p	ENSGALG00000053474
gga-miR-203a	ENSGALG00000053474
gga-miR-133c-3p	ENSGALG00000053474
gga-miR-99a-5p	ENSGALG00000053474
gga-miR-34c-3p	ENSGALG00000053474
gga-miR-122-5p	ENSGALG00000053474
gga-miR-217-5p	ENSGALG00000053474
gga-miR-1b-3p	ENSGALG00000053474
gga-miR-125b-5p	ENSGALG00000053474
gga-miR-31-5p	ENSGALG00000053474
gga-miR-499-5p	ENSGALG00000053474
gga-miR-223	ENSGALG00000053474
gga-miR-449a	ENSGALG00000053474
gga-miR-133a-5p	ENSGALG00000053474
gga-miR-204	ENSGALG00000053474
gga-miR-1a-3p	ENSGALG00000053474
gga-miR-29b-3p	ENSGALG00000053474
gga-miR-146c-3p	ENSGALG00000053474
gga-miR-196-5p	ENSGALG00000053474
gga-miR-133a-3p	ENSGALG00000053474
gga-miR-202-5p	ENSGALG00000053474
gga-miR-130b-3p	ENSGALG00000053474
gga-miR-10a-5p	ENSGALG00000053474
gga-miR-194	ENSGALG00000039355
gga-miR-9-5p	ENSGALG00000039355
gga-let-7j-3p	ENSGALG00000047417
gga-miR-203a	ENSGALG00000047417
gga-miR-133a-5p	ENSGALG00000047417
gga-miR-196-5p	ENSGALG00000047417
gga-miR-200a-5p	ENSGALG00000047417
gga-miR-206	ENSGALG00000047417
gga-miR-200b-5p	ENSGALG00000047417
gga-miR-31-5p	ENSGALG00000047417
gga-miR-202-5p	ENSGALG00000047417
gga-miR-3531-5p	ENSGALG00000047417
gga-miR-1a-3p	ENSGALG00000047417
gga-miR-215-5p	ENSGALG00000047417
gga-miR-122-5p	ENSGALG00000047417
gga-miR-194	ENSGALG00000047417
gga-miR-223	ENSGALG00000047417
gga-miR-1b-3p	ENSGALG00000047417
gga-miR-34c-3p	ENSGALG00000052003
gga-miR-133b	ENSGALG00000052003
gga-miR-449a	ENSGALG00000052003
gga-miR-34b-5p	ENSGALG00000052003
gga-miR-203a	ENSGALG00000052003
gga-miR-34b-3p	ENSGALG00000052003
gga-miR-217-5p	ENSGALG00000052003
gga-miR-34c-5p	ENSGALG00000052003
gga-miR-133c-3p	ENSGALG00000052003
gga-miR-204	ENSGALG00000052003
gga-miR-133a-3p	ENSGALG00000052003
gga-miR-429-3p	ENSGALG00000047398
gga-miR-1744-3p	ENSGALG00000047398
gga-miR-223	ENSGALG00000047398
gga-miR-9-5p	ENSGALG00000047398
gga-miR-460b-5p	ENSGALG00000047398
gga-miR-499-3p	ENSGALG00000047769
gga-miR-202-5p	ENSGALG00000054500
gga-miR-122-3p	ENSGALG00000054500
gga-miR-155	ENSGALG00000054500
gga-miR-217-5p	ENSGALG00000054500
gga-miR-34c-3p	ENSGALG00000054500
gga-miR-130b-3p	ENSGALG00000054500
gga-miR-1684a-3p	ENSGALG00000054500
gga-miR-499-5p	ENSGALG00000054500
gga-miR-454-3p	ENSGALG00000054500
gga-miR-34b-5p	ENSGALG00000054500
gga-miR-34b-3p	ENSGALG00000054500
gga-miR-196-5p	ENSGALG00000050759
gga-miR-215-5p	ENSGALG00000050759
gga-miR-200a-3p	ENSGALG00000050759
gga-miR-29b-3p	ENSGALG00000038021
gga-miR-130b-3p	ENSGALG00000038021
gga-miR-203a	ENSGALG00000054585
gga-miR-196-5p	ENSGALG00000054585
gga-miR-34c-5p	ENSGALG00000054585
gga-miR-1744-3p	ENSGALG00000054585
gga-miR-204	ENSGALG00000054585
gga-miR-34b-5p	ENSGALG00000054585
gga-miR-217-5p	ENSGALG00000054585
gga-miR-429-3p	ENSGALG00000054585
gga-miR-202-5p	ENSGALG00000054585
gga-miR-200b-3p	ENSGALG00000054585
gga-miR-200a-5p	ENSGALG00000054585
gga-miR-1b-3p	ENSGALG00000047057
gga-miR-449a	ENSGALG00000047057
gga-miR-125b-5p	ENSGALG00000047057
gga-miR-34c-5p	ENSGALG00000047057
gga-miR-1a-3p	ENSGALG00000047057
gga-miR-460b-5p	ENSGALG00000047057
gga-miR-3531-5p	ENSGALG00000047057
gga-miR-10a-5p	ENSGALG00000047057
gga-miR-34b-5p	ENSGALG00000047057
gga-miR-206	ENSGALG00000047057
gga-miR-204	ENSGALG00000048597
gga-miR-9-5p	ENSGALG00000048597
gga-miR-460b-5p	ENSGALG00000051605
gga-miR-1b-3p	ENSGALG00000051605
gga-miR-133b	ENSGALG00000051605
gga-miR-10a-5p	ENSGALG00000051605
gga-miR-365-3p	ENSGALG00000051605
gga-miR-1a-3p	ENSGALG00000051605
gga-miR-133c-3p	ENSGALG00000051605
gga-miR-206	ENSGALG00000051605
gga-miR-133a-3p	ENSGALG00000051605
gga-miR-125b-5p	ENSGALG00000051605
gga-miR-9-5p	ENSGALG00000051605
gga-let-7j-3p	ENSGALG00000047398
gga-miR-196-5p	ENSGALG00000054208
gga-miR-155	ENSGALG00000052144
gga-miR-460b-5p	ENSGALG00000052144
gga-miR-200a-3p	ENSGALG00000052144
gga-miR-34c-5p	ENSGALG00000052144
gga-miR-449a	ENSGALG00000052144
gga-miR-122-5p	ENSGALG00000052144
gga-miR-203a	ENSGALG00000052144
gga-let-7j-3p	ENSGALG00000054369
gga-miR-3531-5p	ENSGALG00000054369
gga-miR-130b-3p	ENSGALG00000052742
gga-miR-365b-5p	ENSGALG00000052742
gga-miR-429-3p	ENSGALG00000052742
gga-miR-29b-3p	ENSGALG00000052742
gga-miR-34c-5p	ENSGALG00000052742
gga-miR-454-3p	ENSGALG00000052742
gga-miR-34b-5p	ENSGALG00000052742
gga-miR-223	ENSGALG00000052742
gga-miR-200b-3p	ENSGALG00000052742
gga-miR-1744-3p	ENSGALG00000053091
gga-miR-34b-5p	ENSGALG00000053091
gga-miR-125b-5p	ENSGALG00000053091
gga-miR-133c-3p	ENSGALG00000053669
gga-miR-200b-5p	ENSGALG00000053669
gga-miR-204	ENSGALG00000053669
gga-miR-217-5p	ENSGALG00000053669
gga-miR-10a-5p	ENSGALG00000053669
gga-miR-31-5p	ENSGALG00000053669
gga-miR-202-5p	ENSGALG00000053669
gga-miR-29b-3p	ENSGALG00000053669
gga-miR-133b	ENSGALG00000053669
gga-miR-34b-5p	ENSGALG00000053669
gga-miR-133a-3p	ENSGALG00000053669
gga-miR-1744-3p	ENSGALG00000051109
gga-miR-155	ENSGALG00000051109
gga-miR-200b-5p	ENSGALG00000051109
gga-miR-194	ENSGALG00000051109
gga-miR-3531-5p	ENSGALG00000051109
gga-miR-223	ENSGALG00000051109
gga-miR-196-5p	ENSGALG00000051109
gga-miR-217-5p	ENSGALG00000051109
gga-miR-202-5p	ENSGALG00000051109
gga-miR-200a-3p	ENSGALG00000051109
gga-miR-499-3p	ENSGALG00000051109
gga-miR-122-3p	ENSGALG00000054934
gga-miR-130b-3p	ENSGALG00000054934
gga-miR-203a	ENSGALG00000054934
gga-miR-1744-3p	ENSGALG00000054934
gga-miR-217-5p	ENSGALG00000054934
gga-let-7j-3p	ENSGALG00000054934
gga-miR-206	ENSGALG00000054934
gga-miR-196-5p	ENSGALG00000054934
gga-miR-155	ENSGALG00000054934
gga-miR-449a	ENSGALG00000054934
gga-miR-454-3p	ENSGALG00000054934
gga-miR-122-5p	ENSGALG00000054934
gga-miR-1729-5p	ENSGALG00000054934
gga-miR-499-3p	ENSGALG00000054934
gga-miR-1b-3p	ENSGALG00000054934
gga-miR-3531-5p	ENSGALG00000054934
gga-miR-1a-3p	ENSGALG00000054934
gga-miR-99a-5p	ENSGALG00000054934
gga-miR-187-3p	ENSGALG00000054934
gga-miR-204	ENSGALG00000054934
gga-miR-29b-3p	ENSGALG00000054934
gga-miR-34c-5p	ENSGALG00000054934
gga-miR-9-5p	ENSGALG00000054934
gga-miR-499-5p	ENSGALG00000054934
gga-miR-34b-5p	ENSGALG00000054934
gga-miR-365b-5p	ENSGALG00000054934
gga-miR-133b	ENSGALG00000052990
gga-miR-133c-3p	ENSGALG00000052990
gga-miR-460b-5p	ENSGALG00000052990
gga-miR-133a-3p	ENSGALG00000052990
gga-miR-194	ENSGALG00000053842
gga-miR-365b-5p	ENSGALG00000053842
gga-miR-204	ENSGALG00000053842
gga-miR-130b-3p	ENSGALG00000053842
gga-let-7j-3p	ENSGALG00000051811
gga-miR-223	ENSGALG00000051811
gga-miR-34b-3p	ENSGALG00000051811
gga-miR-34c-5p	ENSGALG00000051811
gga-miR-155	ENSGALG00000051811
gga-miR-499-3p	ENSGALG00000051811
gga-miR-1744-3p	ENSGALG00000051811
gga-miR-194	ENSGALG00000051811
gga-miR-449a	ENSGALG00000051811
gga-miR-454-3p	ENSGALG00000051811
gga-miR-499-5p	ENSGALG00000051811
gga-miR-203a	ENSGALG00000051811
gga-miR-34b-5p	ENSGALG00000051811
gga-miR-34c-3p	ENSGALG00000051811
gga-miR-200a-5p	ENSGALG00000051811
gga-miR-187-3p	ENSGALG00000051811
gga-miR-200b-3p	ENSGALG00000051811
gga-miR-429-3p	ENSGALG00000051811
gga-miR-130b-3p	ENSGALG00000051811
gga-miR-365b-5p	ENSGALG00000035807
gga-miR-206	ENSGALG00000035807
gga-miR-34c-3p	ENSGALG00000035807
gga-miR-9-5p	ENSGALG00000035807
gga-miR-217-5p	ENSGALG00000035807
gga-miR-1684a-3p	ENSGALG00000035807
gga-miR-34b-5p	ENSGALG00000035807
gga-let-7j-3p	ENSGALG00000035807
gga-miR-34b-3p	ENSGALG00000035807
gga-miR-3531-5p	ENSGALG00000035807
gga-miR-34b-3p	ENSGALG00000054934
gga-miR-223	ENSGALG00000052351
gga-miR-34b-5p	ENSGALG00000052351
gga-miR-217-5p	ENSGALG00000052351
gga-miR-34c-5p	ENSGALG00000052351
gga-miR-196-5p	ENSGALG00000052351
gga-miR-375	ENSGALG00000052351
gga-miR-122-5p	ENSGALG00000052351
gga-miR-203a	ENSGALG00000052351
gga-miR-215-5p	ENSGALG00000052351
gga-miR-449a	ENSGALG00000052351
gga-miR-125b-5p	ENSGALG00000052351
gga-let-7j-3p	ENSGALG00000052351
gga-miR-460b-5p	ENSGALG00000051180
gga-miR-499-3p	ENSGALG00000051180
gga-miR-204	ENSGALG00000051180
gga-miR-31-5p	ENSGALG00000051180
gga-miR-365b-5p	ENSGALG00000051180
gga-miR-34c-3p	ENSGALG00000051180
gga-miR-375	ENSGALG00000051180
gga-miR-34b-3p	ENSGALG00000051180
gga-miR-146c-3p	ENSGALG00000051977
gga-miR-1a-3p	ENSGALG00000051977
gga-miR-1b-3p	ENSGALG00000051977
gga-miR-454-3p	ENSGALG00000051977
gga-miR-34c-3p	ENSGALG00000051977
gga-miR-365-3p	ENSGALG00000051977
gga-miR-206	ENSGALG00000051977
gga-miR-375	ENSGALG00000051977
gga-miR-155	ENSGALG00000049530
gga-miR-223	ENSGALG00000049530
gga-miR-499-5p	ENSGALG00000049530
gga-miR-460b-5p	ENSGALG00000049530
gga-miR-203a	ENSGALG00000049530
gga-miR-130b-3p	ENSGALG00000052884
gga-miR-454-3p	ENSGALG00000052884
gga-miR-499-5p	ENSGALG00000052884
gga-miR-204	ENSGALG00000052884
gga-miR-449a	ENSGALG00000052884
gga-miR-34b-5p	ENSGALG00000052884
gga-miR-146c-3p	ENSGALG00000052884
gga-miR-34c-5p	ENSGALG00000052884
gga-miR-29b-3p	ENSGALG00000052884
gga-miR-196-5p	ENSGALG00000052884
gga-miR-34c-5p	ENSGALG00000047735
gga-miR-9-5p	ENSGALG00000047735
gga-miR-187-3p	ENSGALG00000047735
gga-miR-449a	ENSGALG00000047735
gga-miR-34b-5p	ENSGALG00000051605
gga-miR-133a-5p	ENSGALG00000051605
gga-miR-29b-3p	ENSGALG00000051605
gga-miR-217-5p	ENSGALG00000051605
gga-miR-34c-5p	ENSGALG00000051605
gga-miR-449a	ENSGALG00000051605
gga-miR-133a-5p	ENSGALG00000053336
gga-miR-196-5p	ENSGALG00000053336
gga-miR-202-5p	ENSGALG00000053336
gga-miR-34b-5p	ENSGALG00000053336
gga-miR-10a-5p	ENSGALG00000053336
gga-miR-146c-3p	ENSGALG00000053336
gga-miR-206	ENSGALG00000053336
gga-miR-155	ENSGALG00000053336
gga-miR-3531-5p	ENSGALG00000053336
gga-miR-9-5p	ENSGALG00000053336
gga-miR-454-3p	ENSGALG00000053336
gga-miR-200a-3p	ENSGALG00000053336
gga-miR-217-5p	ENSGALG00000053336
gga-miR-130b-3p	ENSGALG00000053336
gga-miR-1b-3p	ENSGALG00000053336
gga-miR-200b-5p	ENSGALG00000053336
gga-miR-365b-5p	ENSGALG00000053336
gga-miR-429-3p	ENSGALG00000053336
gga-miR-125b-5p	ENSGALG00000053336
gga-miR-223	ENSGALG00000053336
gga-miR-200a-5p	ENSGALG00000053336
gga-miR-1684a-3p	ENSGALG00000053336
gga-miR-1a-3p	ENSGALG00000053336
gga-miR-122-5p	ENSGALG00000053336
gga-miR-34c-5p	ENSGALG00000053336
gga-miR-449a	ENSGALG00000053336
gga-miR-200b-3p	ENSGALG00000053336
gga-miR-1729-5p	ENSGALG00000053336
gga-miR-31-5p	ENSGALG00000053336
gga-miR-203a	ENSGALG00000053336
gga-let-7j-3p	ENSGALG00000053336
gga-miR-34c-5p	ENSGALG00000053451
gga-miR-34b-5p	ENSGALG00000053451
gga-miR-449a	ENSGALG00000053451
gga-miR-206	ENSGALG00000053451
gga-miR-9-5p	ENSGALG00000053451
gga-miR-217-5p	ENSGALG00000053451
gga-miR-130b-3p	ENSGALG00000053451
gga-miR-122-5p	ENSGALG00000053451
gga-miR-454-3p	ENSGALG00000053451
gga-miR-203a	ENSGALG00000053451
gga-miR-155	ENSGALG00000050954
gga-miR-29b-3p	ENSGALG00000050954
gga-miR-10a-5p	ENSGALG00000050954
gga-miR-125b-5p	ENSGALG00000050954
gga-miR-133b	ENSGALG00000050954
gga-miR-365-3p	ENSGALG00000050954
gga-miR-215-5p	ENSGALG00000050954
gga-miR-184-3p	ENSGALG00000050954
gga-miR-133c-3p	ENSGALG00000050954
gga-miR-122-5p	ENSGALG00000050954
gga-miR-133a-3p	ENSGALG00000050954
gga-miR-122-3p	ENSGALG00000050954
gga-miR-375	ENSGALG00000050954
gga-miR-133a-3p	ENSGALG00000054369
gga-miR-217-5p	ENSGALG00000054369
gga-miR-133c-3p	ENSGALG00000054369
gga-miR-146c-3p	ENSGALG00000054369
gga-miR-133b	ENSGALG00000054369
gga-miR-365b-5p	ENSGALG00000054369
gga-miR-125b-5p	ENSGALG00000054369
gga-miR-155	ENSGALG00000054369
gga-miR-223	ENSGALG00000054601
gga-miR-202-5p	ENSGALG00000054601
gga-miR-34b-5p	ENSGALG00000054601
gga-miR-196-5p	ENSGALG00000054601
gga-miR-217-5p	ENSGALG00000054601
gga-miR-204	ENSGALG00000054601
gga-miR-133a-5p	ENSGALG00000054601
gga-miR-146c-3p	ENSGALG00000054601
gga-miR-3531-5p	ENSGALG00000051180
gga-miR-215-5p	ENSGALG00000051180
gga-miR-9-5p	ENSGALG00000051180
gga-miR-460b-5p	ENSGALG00000050475
gga-miR-200a-3p	ENSGALG00000050475
gga-miR-499-3p	ENSGALG00000050475
gga-miR-31-5p	ENSGALG00000050475
gga-miR-3531-5p	ENSGALG00000050475
gga-miR-9-5p	ENSGALG00000050475
gga-miR-133b	ENSGALG00000050475
gga-miR-122-5p	ENSGALG00000050475
gga-miR-203a	ENSGALG00000050475
gga-miR-1744-3p	ENSGALG00000050475
gga-miR-146c-3p	ENSGALG00000050475
gga-miR-200b-5p	ENSGALG00000050475
gga-miR-1684a-3p	ENSGALG00000050475
gga-miR-133a-3p	ENSGALG00000050475
gga-miR-202-5p	ENSGALG00000050475
gga-miR-194	ENSGALG00000050475
gga-miR-429-3p	ENSGALG00000050475
gga-miR-133c-3p	ENSGALG00000050475
gga-miR-365b-5p	ENSGALG00000050475
gga-miR-499-5p	ENSGALG00000050475
gga-miR-196-5p	ENSGALG00000048674
gga-miR-122-5p	ENSGALG00000048674
gga-miR-10a-5p	ENSGALG00000048674
gga-miR-217-5p	ENSGALG00000048674
gga-miR-3531-5p	ENSGALG00000048674
gga-miR-365b-5p	ENSGALG00000053940
gga-miR-184-3p	ENSGALG00000053940
gga-miR-200a-3p	ENSGALG00000053940
gga-miR-187-3p	ENSGALG00000053940
gga-miR-9-5p	ENSGALG00000053940
gga-miR-3531-5p	ENSGALG00000053982
gga-miR-10a-5p	ENSGALG00000053982
gga-miR-204	ENSGALG00000053982
gga-miR-200b-5p	ENSGALG00000053982
gga-miR-31-5p	ENSGALG00000053982
gga-miR-217-5p	ENSGALG00000048807
gga-miR-449a	ENSGALG00000048807
gga-miR-34c-5p	ENSGALG00000048807
gga-miR-215-5p	ENSGALG00000048807
gga-miR-34b-5p	ENSGALG00000048807
gga-miR-122-5p	ENSGALG00000048807
gga-miR-217-5p	ENSGALG00000049530
gga-miR-449a	ENSGALG00000049530
gga-miR-1744-3p	ENSGALG00000049530
gga-miR-1a-3p	ENSGALG00000049530
gga-miR-34c-5p	ENSGALG00000049530
gga-miR-204	ENSGALG00000049530
gga-miR-1b-3p	ENSGALG00000049530
gga-miR-499-3p	ENSGALG00000049530
gga-miR-206	ENSGALG00000049530
gga-miR-155	ENSGALG00000052555
gga-miR-130b-3p	ENSGALG00000052555
gga-miR-454-3p	ENSGALG00000052555
gga-miR-499-5p	ENSGALG00000052555
gga-miR-499-3p	ENSGALG00000052555
gga-miR-217-5p	ENSGALG00000052555
gga-miR-1729-5p	ENSGALG00000052133
gga-miR-1b-3p	ENSGALG00000052133
gga-miR-460b-5p	ENSGALG00000052133
gga-miR-449a	ENSGALG00000052133
gga-miR-203a	ENSGALG00000052133
gga-miR-499-3p	ENSGALG00000052133
gga-miR-31-5p	ENSGALG00000052133
gga-miR-1684a-3p	ENSGALG00000052133
gga-miR-34b-3p	ENSGALG00000052133
gga-miR-34c-3p	ENSGALG00000052133
gga-miR-34c-5p	ENSGALG00000052133
gga-miR-1a-3p	ENSGALG00000052133
gga-miR-499-5p	ENSGALG00000052133
gga-miR-204	ENSGALG00000052133
gga-miR-34b-5p	ENSGALG00000052133
gga-miR-365-3p	ENSGALG00000052133
gga-miR-223	ENSGALG00000052133
gga-miR-146c-3p	ENSGALG00000052133
gga-let-7j-3p	ENSGALG00000052133
gga-miR-206	ENSGALG00000052133
gga-miR-200a-3p	ENSGALG00000052133
gga-miR-3531-5p	ENSGALG00000053182
gga-miR-215-5p	ENSGALG00000053182
gga-miR-206	ENSGALG00000053182
gga-miR-9-5p	ENSGALG00000053182
gga-miR-223	ENSGALG00000053182
gga-miR-375	ENSGALG00000053182
gga-miR-1a-3p	ENSGALG00000053182
gga-miR-1b-3p	ENSGALG00000053182
gga-miR-3531-5p	ENSGALG00000047667
gga-miR-184-3p	ENSGALG00000047667
gga-miR-460b-5p	ENSGALG00000047667
gga-miR-29b-3p	ENSGALG00000049832
gga-miR-133a-3p	ENSGALG00000049832
gga-miR-10a-5p	ENSGALG00000049832
gga-miR-9-5p	ENSGALG00000049832
gga-miR-206	ENSGALG00000049832
gga-miR-133c-3p	ENSGALG00000049832
gga-miR-1b-3p	ENSGALG00000049832
gga-miR-130b-3p	ENSGALG00000049832
gga-miR-1a-3p	ENSGALG00000049832
gga-miR-3531-5p	ENSGALG00000049832
gga-miR-133b	ENSGALG00000049832
gga-miR-200b-5p	ENSGALG00000049832
gga-miR-454-3p	ENSGALG00000049832
gga-miR-203a	ENSGALG00000049832
gga-miR-365b-5p	ENSGALG00000049832
gga-miR-1b-3p	ENSGALG00000051477
gga-miR-1a-3p	ENSGALG00000051477
gga-miR-206	ENSGALG00000051477
gga-miR-29b-3p	ENSGALG00000051477
gga-miR-3531-5p	ENSGALG00000049164
gga-miR-203a	ENSGALG00000049164
gga-miR-202-5p	ENSGALG00000049164
gga-miR-34b-5p	ENSGALG00000051207
gga-miR-449a	ENSGALG00000051207
gga-miR-200a-3p	ENSGALG00000051207
gga-miR-1729-5p	ENSGALG00000051207
gga-miR-200b-3p	ENSGALG00000051207
gga-miR-204	ENSGALG00000051207
gga-miR-202-5p	ENSGALG00000051207
gga-miR-34c-5p	ENSGALG00000051207
gga-miR-429-3p	ENSGALG00000051207
gga-miR-133b	ENSGALG00000052742
gga-miR-202-5p	ENSGALG00000052742
gga-miR-133a-3p	ENSGALG00000052742
gga-miR-203a	ENSGALG00000052742
gga-miR-133c-3p	ENSGALG00000052742
gga-miR-184-3p	ENSGALG00000052058
gga-miR-1a-3p	ENSGALG00000052058
gga-miR-133b	ENSGALG00000052058
gga-miR-133c-3p	ENSGALG00000052058
gga-miR-133a-3p	ENSGALG00000052058
gga-miR-194	ENSGALG00000052058
gga-miR-206	ENSGALG00000052058
gga-miR-1b-3p	ENSGALG00000052058
gga-miR-3531-5p	ENSGALG00000050843
gga-miR-449a	ENSGALG00000050843
gga-let-7j-3p	ENSGALG00000050843
gga-miR-187-3p	ENSGALG00000050843
gga-miR-200a-5p	ENSGALG00000050843
gga-miR-200b-5p	ENSGALG00000050843
gga-miR-34b-5p	ENSGALG00000050843
gga-miR-9-5p	ENSGALG00000050843
gga-miR-1684a-3p	ENSGALG00000050843
gga-miR-34c-5p	ENSGALG00000050843
gga-miR-223	ENSGALG00000050843
gga-miR-460b-5p	ENSGALG00000051070
gga-miR-365b-5p	ENSGALG00000051070
gga-miR-202-5p	ENSGALG00000048832
gga-miR-9-5p	ENSGALG00000048832
gga-miR-203a	ENSGALG00000048832
gga-miR-429-3p	ENSGALG00000054601
gga-miR-365b-5p	ENSGALG00000054601
gga-miR-122-3p	ENSGALG00000054601
gga-miR-200b-3p	ENSGALG00000054601
gga-miR-200a-3p	ENSGALG00000054601
gga-miR-202-5p	ENSGALG00000047577
gga-miR-130b-3p	ENSGALG00000047577
gga-miR-200b-3p	ENSGALG00000047577
gga-miR-204	ENSGALG00000047577
gga-miR-429-3p	ENSGALG00000047577
gga-miR-454-3p	ENSGALG00000047577
gga-miR-34b-5p	ENSGALG00000047577
gga-miR-365-3p	ENSGALG00000047577
gga-miR-206	ENSGALG00000054431
gga-miR-130b-3p	ENSGALG00000054431
gga-miR-203a	ENSGALG00000054431
gga-miR-215-5p	ENSGALG00000054431
gga-miR-202-5p	ENSGALG00000054431
gga-miR-365-3p	ENSGALG00000054431
gga-miR-155	ENSGALG00000054431
gga-miR-34b-3p	ENSGALG00000054431
gga-miR-31-5p	ENSGALG00000054431
gga-miR-34c-5p	ENSGALG00000054431
gga-miR-1b-3p	ENSGALG00000054431
gga-miR-499-5p	ENSGALG00000054431
gga-miR-499-3p	ENSGALG00000054431
gga-miR-200a-3p	ENSGALG00000054431
gga-miR-34b-5p	ENSGALG00000054431
gga-miR-460b-5p	ENSGALG00000054431
gga-miR-194	ENSGALG00000054431
gga-miR-9-5p	ENSGALG00000054431
gga-miR-365b-5p	ENSGALG00000054431
gga-miR-1a-3p	ENSGALG00000054431
gga-miR-375	ENSGALG00000054431
gga-miR-204	ENSGALG00000054431
gga-miR-10a-5p	ENSGALG00000054431
gga-miR-200a-5p	ENSGALG00000054431
gga-miR-200b-5p	ENSGALG00000054431
gga-miR-449a	ENSGALG00000054431
gga-miR-122-5p	ENSGALG00000054431
gga-miR-200b-3p	ENSGALG00000054431
gga-miR-223	ENSGALG00000054431
gga-let-7j-3p	ENSGALG00000054431
gga-miR-3531-5p	ENSGALG00000054431
gga-miR-429-3p	ENSGALG00000054431
gga-miR-217-5p	ENSGALG00000054431
gga-let-7j-3p	ENSGALG00000053301
gga-miR-429-3p	ENSGALG00000053301
gga-miR-200b-3p	ENSGALG00000053301
gga-miR-1b-3p	ENSGALG00000053301
gga-miR-365b-5p	ENSGALG00000053301
gga-miR-29b-3p	ENSGALG00000053624
gga-miR-125b-5p	ENSGALG00000053624
gga-miR-1684a-3p	ENSGALG00000053624
gga-miR-429-3p	ENSGALG00000048536
gga-miR-155	ENSGALG00000048536
gga-miR-223	ENSGALG00000048536
gga-miR-217-5p	ENSGALG00000048536
gga-miR-200b-5p	ENSGALG00000048536
gga-let-7j-3p	ENSGALG00000048536
gga-miR-204	ENSGALG00000048536
gga-miR-200b-3p	ENSGALG00000048536
gga-miR-200a-5p	ENSGALG00000048536
gga-miR-3531-5p	ENSGALG00000048536
gga-miR-34b-5p	ENSGALG00000048536
gga-miR-1684a-3p	ENSGALG00000048536
gga-miR-204	ENSGALG00000052830
gga-miR-34b-3p	ENSGALG00000052830
gga-miR-206	ENSGALG00000052830
gga-miR-499-5p	ENSGALG00000052830
gga-miR-200a-5p	ENSGALG00000052830
gga-miR-155	ENSGALG00000052830
gga-miR-1729-5p	ENSGALG00000052830
gga-miR-29b-3p	ENSGALG00000052830
gga-miR-215-5p	ENSGALG00000052830
gga-miR-200b-3p	ENSGALG00000052830
gga-miR-499-3p	ENSGALG00000052830
gga-miR-1b-3p	ENSGALG00000052830
gga-miR-9-5p	ENSGALG00000052830
gga-miR-31-5p	ENSGALG00000052830
gga-miR-200b-5p	ENSGALG00000052830
gga-miR-10a-5p	ENSGALG00000052830
gga-miR-223	ENSGALG00000052830
gga-miR-1684a-3p	ENSGALG00000052830
gga-miR-34c-5p	ENSGALG00000052830
gga-miR-34c-3p	ENSGALG00000052830
gga-miR-217-5p	ENSGALG00000052830
gga-miR-3531-5p	ENSGALG00000052830
gga-miR-1744-3p	ENSGALG00000052830
gga-miR-449a	ENSGALG00000052830
gga-miR-203a	ENSGALG00000052830
gga-let-7j-3p	ENSGALG00000052830
gga-miR-194	ENSGALG00000052830
gga-miR-34b-5p	ENSGALG00000052830
gga-miR-375	ENSGALG00000052830
gga-miR-454-3p	ENSGALG00000052830
gga-miR-196-5p	ENSGALG00000052830
gga-miR-130b-3p	ENSGALG00000052830
gga-miR-184-3p	ENSGALG00000052830
gga-miR-429-3p	ENSGALG00000052830
gga-miR-206	ENSGALG00000051683
gga-miR-200a-3p	ENSGALG00000051683
gga-miR-217-5p	ENSGALG00000051683
gga-miR-146c-3p	MSTRG.10090
gga-miR-454-3p	MSTRG.10090
gga-miR-9-5p	MSTRG.10090
gga-miR-203a	MSTRG.10090
gga-miR-449a	MSTRG.10098
gga-miR-454-3p	MSTRG.1066
gga-miR-130b-3p	MSTRG.1066
gga-miR-31-5p	MSTRG.1066
gga-miR-155	MSTRG.1066
gga-miR-223	MSTRG.1066
gga-miR-206	MSTRG.1066
gga-miR-499-3p	MSTRG.1066
gga-miR-1729-5p	MSTRG.1066
gga-miR-202-5p	MSTRG.1066
gga-miR-133a-5p	MSTRG.1066
gga-miR-203a	MSTRG.1066
gga-miR-34c-5p	MSTRG.1066
gga-miR-9-5p	MSTRG.1066
gga-miR-200b-5p	MSTRG.1066
gga-miR-1a-3p	MSTRG.1066
gga-miR-122-3p	MSTRG.1066
gga-miR-3531-5p	MSTRG.1066
gga-miR-429-3p	MSTRG.1066
gga-miR-449a	MSTRG.1066
gga-miR-217-5p	MSTRG.1066
gga-miR-1b-3p	MSTRG.1066
gga-miR-146c-3p	MSTRG.1066
gga-miR-204	MSTRG.1066
gga-miR-34b-5p	MSTRG.1066
gga-miR-460b-5p	MSTRG.1066
gga-miR-1684a-3p	MSTRG.1066
gga-miR-122-5p	MSTRG.1066
gga-miR-365b-5p	MSTRG.1066
gga-miR-125b-5p	MSTRG.1066
gga-miR-187-3p	MSTRG.1066
gga-miR-499-5p	MSTRG.1066
gga-miR-200a-3p	MSTRG.1066
gga-miR-200a-5p	MSTRG.1066
gga-miR-200b-3p	MSTRG.1066
gga-miR-3531-5p	MSTRG.10749
gga-miR-365b-5p	MSTRG.10749
gga-miR-34c-5p	MSTRG.10749
gga-miR-365-3p	MSTRG.10749
gga-miR-200b-5p	MSTRG.10749
gga-miR-10a-5p	MSTRG.10749
gga-miR-202-5p	MSTRG.10749
gga-miR-200a-3p	MSTRG.10749
gga-miR-194	MSTRG.10749
gga-miR-34b-5p	MSTRG.10749
gga-miR-206	MSTRG.10749
gga-miR-34b-3p	MSTRG.10749
gga-miR-449a	MSTRG.10749
gga-miR-122-5p	MSTRG.10749
gga-miR-1a-3p	MSTRG.10749
gga-miR-9-5p	MSTRG.10749
gga-miR-1b-3p	MSTRG.10749
gga-miR-34c-3p	MSTRG.10749
gga-miR-130b-3p	MSTRG.10768
gga-miR-429-3p	MSTRG.10768
gga-miR-200a-5p	MSTRG.10768
gga-miR-200b-5p	MSTRG.10768
gga-let-7j-3p	MSTRG.10768
gga-miR-34b-5p	MSTRG.10768
gga-miR-200b-3p	MSTRG.10768
gga-miR-223	MSTRG.10768
gga-miR-365b-5p	MSTRG.10768
gga-miR-202-5p	MSTRG.10768
gga-miR-203a	MSTRG.10768
gga-miR-454-3p	MSTRG.10768
gga-miR-122-5p	MSTRG.10768
gga-miR-217-5p	MSTRG.10844
gga-miR-449a	MSTRG.10844
gga-miR-460b-5p	MSTRG.10844
gga-miR-10a-5p	MSTRG.10844
gga-miR-1744-3p	MSTRG.10844
gga-miR-34c-5p	MSTRG.10844
gga-miR-34b-5p	MSTRG.10844
gga-miR-9-5p	MSTRG.10844
gga-miR-1729-5p	MSTRG.10887
gga-miR-499-3p	MSTRG.10887
gga-miR-217-5p	MSTRG.10887
gga-miR-460b-5p	MSTRG.10887
gga-miR-34b-5p	MSTRG.10887
gga-miR-184-3p	MSTRG.10887
gga-miR-1a-3p	MSTRG.10887
gga-miR-206	MSTRG.10887
gga-miR-194	MSTRG.10887
gga-miR-125b-5p	MSTRG.10887
gga-miR-187-3p	MSTRG.10887
gga-miR-449a	MSTRG.10887
gga-miR-9-5p	MSTRG.10887
gga-miR-202-5p	MSTRG.10887
gga-miR-375	MSTRG.10887
gga-miR-204	MSTRG.10887
gga-miR-34c-5p	MSTRG.10887
gga-miR-1b-3p	MSTRG.10887
gga-miR-29b-3p	MSTRG.10887
gga-miR-99a-5p	MSTRG.10887
gga-miR-3531-5p	MSTRG.10887
gga-miR-429-3p	MSTRG.1127
gga-miR-194	MSTRG.1127
gga-miR-204	MSTRG.1127
gga-miR-146c-3p	MSTRG.1127
gga-miR-217-5p	MSTRG.1127
gga-miR-365b-5p	MSTRG.1127
gga-miR-206	MSTRG.1127
gga-miR-1a-3p	MSTRG.1127
gga-miR-125b-5p	MSTRG.1127
gga-miR-1b-3p	MSTRG.1127
gga-miR-155	MSTRG.1127
gga-miR-200a-3p	MSTRG.1127
gga-miR-133a-5p	MSTRG.1127
gga-miR-200a-5p	MSTRG.1127
gga-miR-200b-5p	MSTRG.1127
gga-miR-223	MSTRG.1127
gga-miR-200b-3p	MSTRG.1127
gga-miR-34c-5p	MSTRG.1127
gga-miR-449a	MSTRG.1127
gga-let-7j-3p	MSTRG.1127
gga-miR-31-5p	MSTRG.1127
gga-miR-1744-3p	MSTRG.1127
gga-miR-204	MSTRG.11440
gga-miR-1b-3p	MSTRG.11440
gga-miR-34c-5p	MSTRG.11440
gga-miR-125b-5p	MSTRG.11440
gga-miR-449a	MSTRG.11440
gga-miR-9-5p	MSTRG.11440
gga-miR-187-3p	MSTRG.11440
gga-miR-206	MSTRG.11440
gga-miR-375	MSTRG.11440
gga-miR-1a-3p	MSTRG.11440
gga-miR-34b-5p	MSTRG.11440
gga-miR-133a-3p	MSTRG.11440
gga-miR-184-3p	MSTRG.11440
gga-miR-99a-5p	MSTRG.11440
gga-miR-133c-3p	MSTRG.11440
gga-miR-133b	MSTRG.11440
gga-miR-133b	MSTRG.11463
gga-miR-206	MSTRG.11463
gga-miR-34b-5p	MSTRG.11463
gga-miR-454-3p	MSTRG.11463
gga-miR-365b-5p	MSTRG.11463
gga-miR-194	MSTRG.11463
gga-miR-217-5p	MSTRG.11463
gga-miR-1a-3p	MSTRG.11463
gga-miR-130b-3p	MSTRG.11463
gga-miR-9-5p	MSTRG.11463
gga-miR-187-3p	MSTRG.11463
gga-miR-133c-3p	MSTRG.11463
gga-miR-1b-3p	MSTRG.11463
gga-miR-133a-5p	MSTRG.11463
gga-miR-429-3p	MSTRG.11463
gga-miR-1684a-3p	MSTRG.11463
gga-miR-34c-5p	MSTRG.11463
gga-miR-196-5p	MSTRG.11463
gga-miR-3531-5p	MSTRG.11463
gga-miR-223	MSTRG.11463
gga-miR-375	MSTRG.11463
gga-miR-460b-5p	MSTRG.11463
gga-miR-200b-5p	MSTRG.11463
gga-miR-449a	MSTRG.11463
gga-miR-200a-5p	MSTRG.11463
gga-miR-133a-3p	MSTRG.11463
gga-let-7j-3p	MSTRG.11463
gga-miR-203a	MSTRG.11463
gga-miR-200b-3p	MSTRG.11463
gga-miR-215-5p	MSTRG.11463
gga-miR-122-5p	MSTRG.11463
gga-miR-200a-3p	MSTRG.11463
gga-miR-29b-3p	MSTRG.11585
gga-miR-206	MSTRG.11585
gga-let-7j-3p	MSTRG.11585
gga-miR-204	MSTRG.11585
gga-miR-223	MSTRG.11585
gga-miR-203a	MSTRG.11585
gga-miR-1b-3p	MSTRG.11585
gga-miR-1a-3p	MSTRG.11585
gga-miR-200b-5p	MSTRG.11585
gga-miR-10a-5p	MSTRG.11585
gga-miR-133a-5p	MSTRG.11647
gga-miR-146c-3p	MSTRG.11647
gga-miR-29b-3p	MSTRG.11647
gga-miR-460b-5p	MSTRG.11647
gga-miR-1744-3p	MSTRG.11647
gga-miR-499-5p	MSTRG.11647
gga-miR-34c-3p	MSTRG.11647
gga-miR-203a	MSTRG.11647
gga-miR-130b-3p	MSTRG.11647
gga-miR-1684a-3p	MSTRG.11647
gga-miR-200a-3p	MSTRG.11647
gga-miR-155	MSTRG.11647
gga-miR-454-3p	MSTRG.11647
gga-miR-217-5p	MSTRG.11647
gga-miR-34c-5p	MSTRG.11647
gga-miR-34b-5p	MSTRG.11647
gga-miR-429-3p	MSTRG.11647
gga-miR-449a	MSTRG.11647
gga-miR-204	MSTRG.11647
gga-miR-200a-5p	MSTRG.11647
gga-miR-454-3p	MSTRG.11788
gga-miR-9-5p	MSTRG.11788
gga-miR-29b-3p	MSTRG.11788
gga-miR-10a-5p	MSTRG.11788
gga-miR-203a	MSTRG.11788
gga-miR-204	MSTRG.11788
gga-miR-34b-5p	MSTRG.11788
gga-miR-1a-3p	MSTRG.11788
gga-miR-34c-5p	MSTRG.11788
gga-miR-460b-5p	MSTRG.11788
gga-let-7j-3p	MSTRG.11788
gga-miR-499-3p	MSTRG.11788
gga-miR-200b-5p	MSTRG.11788
gga-miR-1b-3p	MSTRG.11788
gga-miR-365b-5p	MSTRG.11788
gga-miR-217-5p	MSTRG.11792
gga-miR-194	MSTRG.11792
gga-miR-499-3p	MSTRG.11792
gga-miR-34b-5p	MSTRG.11792
gga-miR-200b-3p	MSTRG.11792
gga-miR-1729-5p	MSTRG.11792
gga-miR-3531-5p	MSTRG.11792
gga-miR-31-5p	MSTRG.11792
gga-miR-204	MSTRG.11792
gga-miR-200a-3p	MSTRG.11792
gga-miR-200a-5p	MSTRG.11792
gga-miR-130b-3p	MSTRG.11792
gga-miR-146c-3p	MSTRG.11792
gga-miR-206	MSTRG.11792
gga-miR-122-3p	MSTRG.11792
gga-miR-133a-3p	MSTRG.11792
gga-miR-34c-3p	MSTRG.11792
gga-miR-454-3p	MSTRG.11792
gga-miR-429-3p	MSTRG.11792
gga-miR-133b	MSTRG.11792
gga-miR-196-5p	MSTRG.11792
gga-miR-1b-3p	MSTRG.11792
gga-miR-1684a-3p	MSTRG.11792
gga-miR-34b-3p	MSTRG.11792
gga-miR-365b-5p	MSTRG.11792
gga-miR-187-3p	MSTRG.11792
gga-miR-1744-3p	MSTRG.11792
gga-miR-29b-3p	MSTRG.11792
gga-miR-133a-5p	MSTRG.11792
gga-miR-133c-3p	MSTRG.11792
gga-miR-155	MSTRG.11792
gga-miR-9-5p	MSTRG.11792
gga-miR-10a-5p	MSTRG.11792
gga-miR-200b-5p	MSTRG.11792
gga-miR-122-5p	MSTRG.11792
gga-miR-202-5p	MSTRG.11792
gga-miR-203a	MSTRG.11792
gga-miR-499-5p	MSTRG.11792
gga-miR-34c-5p	MSTRG.11792
gga-miR-460b-5p	MSTRG.11792
gga-miR-215-5p	MSTRG.11792
gga-miR-449a	MSTRG.11792
gga-miR-122-3p	MSTRG.11806
gga-miR-202-5p	MSTRG.11806
gga-miR-1729-5p	MSTRG.11903
gga-miR-499-5p	MSTRG.11903
gga-miR-1b-3p	MSTRG.11903
gga-miR-1a-3p	MSTRG.11903
[truncated: 2,059 more rows]
